# Supplementary material for: Peer-to-peer mentoring for individuals with early inflammatory arthritis: feasibility pilot
Source: PubMed Central journal article supplement — BMJ Open. 2013 Mar 1;3(3):e002267. doi: 10.1136/bmjopen-2012-002267 (PMC3612764; doi:10.1136/bmjopen-2012-002267), 2013-03-01
Supplement: bmjopen-2012-002267.draft_revisions.pdf [file bmjopen-2012-002267.draft_revisions.pdf]

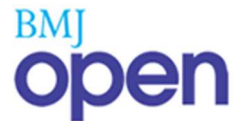

**Peer-to-Peer Mentoring for Individuals with Early  
Inflammatory Arthritis: Feasibility Pilot**

|                                    |                                                                                                                                                                                                                                                                                                                                                                                                                                                                                                                                                                                                                                                                                                                                                                                           |
|------------------------------------|-------------------------------------------------------------------------------------------------------------------------------------------------------------------------------------------------------------------------------------------------------------------------------------------------------------------------------------------------------------------------------------------------------------------------------------------------------------------------------------------------------------------------------------------------------------------------------------------------------------------------------------------------------------------------------------------------------------------------------------------------------------------------------------------|
| Journal:                           | <i>BMJ Open</i>                                                                                                                                                                                                                                                                                                                                                                                                                                                                                                                                                                                                                                                                                                                                                                           |
| Manuscript ID:                     | bmjopen-2012-002267                                                                                                                                                                                                                                                                                                                                                                                                                                                                                                                                                                                                                                                                                                                                                                       |
| Article Type:                      | Research                                                                                                                                                                                                                                                                                                                                                                                                                                                                                                                                                                                                                                                                                                                                                                                  |
| Date Submitted by the Author:      | 25-Oct-2012                                                                                                                                                                                                                                                                                                                                                                                                                                                                                                                                                                                                                                                                                                                                                                               |
| Complete List of Authors:          | Sandhu, Sharron; Sunnybrook Health Sciences Centre, Rheumatology<br>Veinot, Paula; Sunnybrook Health Sciences Centre, Rheumatology<br>Embuldeniya, Gayathri; Sunnybrook Health Sciences Centre,<br>Rheumatology<br>Brooks, Sydney; The Arthritis Society, Ontario Division<br>Sale, Joanna; St. Michael's Hospital, Mobility Program Clinical Research<br>Unit; University of Toronto, Health Policy<br>Huang, Sicong; Sunnybrook Health Sciences Centre, Rheumatology;<br>University of Toronto, Medicine<br>Zhao, Alex; Sunnybrook Health Sciences Centre, Rheumatology; University<br>of Toronto, Medicine<br>Richards, Dawn; Canadian Arthritis Network Consumer Advisory Council,<br>Bell, Mary; Sunnybrook Health Sciences Centre, Rheumatology; University<br>of Toronto, Medicine |
| <b>Primary Subject<br>Heading</b>: | Rheumatology                                                                                                                                                                                                                                                                                                                                                                                                                                                                                                                                                                                                                                                                                                                                                                              |
| Secondary Subject Heading:         | Health services research                                                                                                                                                                                                                                                                                                                                                                                                                                                                                                                                                                                                                                                                                                                                                                  |
| Keywords:                          | arthritis, early inflammatory arthritis, health services research, rheumatoid<br>arthritis, Rheumatology < INTERNAL MEDICINE                                                                                                                                                                                                                                                                                                                                                                                                                                                                                                                                                                                                                                                              |
|                                    |                                                                                                                                                                                                                                                                                                                                                                                                                                                                                                                                                                                                                                                                                                                                                                                           |

SCHOLARONE™  
Manuscripts

1  
2  
3 **Peer-to-Peer Mentoring for Individuals with Early Inflammatory Arthritis:**  
4  
5 **Feasibility Pilot**  
6  
7  
8  
9

10 Address correspondence to Dr. Mary J. Bell, Division of Rheumatology, Sunnybrook  
11 Health Sciences Centre, 2075 Bayview Ave., Room M1-401, Toronto, Ontario M4N  
12 3M5, Canada. E-mail: [mary.bell@sunnybrook.ca](mailto:mary.bell@sunnybrook.ca)  
13  
14  
15  
16  
17

18  
19  
20 Sharron Sandhu, MB BCh BAO, MRCP, CCST, MScCH, Division of Rheumatology,  
21 Sunnybrook Health Sciences Centre, Toronto, Canada  
22  
23

24 Paula Veinot, MHSc, Division of Rheumatology, Sunnybrook Health Sciences Centre,  
25 Toronto, Canada  
26  
27

28  
29 Gayathri Embuldeniya, PhD, Division of Rheumatology, Sunnybrook Health Sciences  
30 Centre, Toronto, Canada  
31  
32

33  
34 Sydney Brooks, PhD, The Arthritis Society - Ontario Division, Toronto, Ontario, Canada  
35

36 Joanna Sale, PhD, Mobility Program Clinical Research Unit, St. Michael's Hospital,  
37 Toronto, Ontario, Canada; Department of Health Policy, University of Toronto,  
38 Toronto, Canada  
39  
40  
41  
42

43 Sicong Huang, BSc, Division of Rheumatology, Sunnybrook Health Sciences Centre,  
44 Toronto, Canada; Faculty of Medicine, University of Toronto, Toronto, Canada  
45  
46

47 Alex Zhao, BHSc, Division of Rheumatology, Sunnybrook Health Sciences Centre,  
48 Toronto, Canada; Faculty of Medicine, University of Toronto, Toronto, Canada  
49  
50

51 Dawn Richards, PhD, Canadian Arthritis Network Consumer Advisory Council, Toronto,  
52 Ontario, Canada  
53  
54  
55  
56  
57  
58  
59  
60

1  
2  
3 Mary J. Bell, MD, MSc, FRCPC, Division of Rheumatology, Sunnybrook Health  
4  
5 Sciences Centre, Toronto, Canada; Faculty of Medicine, University of Toronto,  
6  
7 Toronto, Canada  
8  
9  
10

11  
12 **Key Indexing Terms:** Arthritis, Early Rheumatoid Arthritis, Health Services Research,  
13  
14 Rheumatoid Arthritis  
15  
16

17  
18  
19 **Word count:** 3090  
20  
21  
22  
23  
24  
25  
26  
27  
28  
29  
30  
31  
32  
33  
34  
35  
36  
37  
38  
39  
40  
41  
42  
43  
44  
45  
46  
47  
48  
49  
50  
51  
52  
53  
54  
55  
56  
57  
58  
59  
60

## ABSTRACT

**Objectives:** To examine the feasibility and potential benefits of early peer support to improve the health and quality of life of individuals with early inflammatory arthritis (EIA).

**Design:** Feasibility study using the 2008 Medical Research Council framework as a theoretical basis. A literature review, environmental scan, and interviews with patients, families, and health-care providers guided the development of peer mentor training sessions and a peer-to-peer mentoring program. Peer mentors were trained and paired with a mentee to receive (face-to-face or telephone) support over 12-weeks.

**Setting:** Two academic teaching hospitals in Toronto, Ontario, Canada.

**Participants:** Nine pairs consisting of one peer mentor and one mentee were matched based on factors such as age and work status.

**Primary outcome measure:** Mentee outcomes of *disease modifying anti-rheumatic drugs (DMARDs)/biologic treatment use, self-efficacy, self-management, health-related quality of life, anxiety, coping-efficacy, social support, and disease activity* were measured using validated tools. Descriptive statistics and effect sizes were calculated to determine clinically important ( $>0.3$ ) changes. Peer mentor *self-efficacy* was assessed using a self-efficacy scale. Interviews conducted with participants examined acceptability and feasibility of procedures and outcome measures, and perspectives on the value of peer support for individuals with EIA. Themes were identified through constant comparison.

**Results:** Mentees experienced improvements in the overall arthritis impact on life, coping efficacy, and social support (effect size $>0.3$ ). Mentees also perceived emotional,

1  
2  
3 informational, appraisal and instrumental support. Mentors also reported benefits and  
4  
5 learned from mentees' fortitude and self-management skills. The training was well-  
6  
7 received by mentors. Their self-efficacy increased significantly after training completion.  
8  
9  
10 Participants' experience of peer support was informed by the unique relationship with  
11  
12 their peer. All participants were unequivocal about the need for peer support for  
13  
14 individuals with EIA.  
15  
16

17 **Conclusions:** The intervention was well-received. Training, peer support program and  
18  
19 outcome measures were demonstrated to be feasible with modifications. Early peer  
20  
21 support may augment current rheumatologic care.  
22  
23

24 **Trial registry:** NCT01054963, NCT01054131  
25  
26  
27  
28  
29  
30  
31  
32  
33  
34  
35  
36  
37  
38  
39  
40  
41  
42  
43  
44  
45  
46  
47  
48  
49  
50  
51  
52  
53  
54  
55  
56  
57  
58  
59  
60

## ARTICLE SUMMARY

### Article focus

- Feasibility study for developing, implementing and evaluating a peer support intervention (peer mentor training peer mentoring program consisting of 12-weeks of face-to-face or telephone meetings to support mentees newly diagnosed with early inflammatory arthritis (EIA).

### Key messages

- Early peer support is feasible and well-received by both mentors and mentees.
- Individuals with EIA may benefit from peer support, and this may augment current rheumatologic care.

### Strengths and limitations of this study

- The study was guided by the 2008 Medical Research Council Framework for Complex Interventions.
- The intervention was well-received and had benefits for both mentors and mentees.
- As rheumatoid arthritis was the diagnosis of all participants, further study is needed to assess benefit of early peer support for other types of inflammatory arthritis.

## INTRODUCTION

Inflammatory arthritis (IA) is a leading cause of functional disability, chronic pain, and psychosocial distress (1,2). Patient self-management, education, and social support networks are encouraged as part of a holistic approach to disease management (3). A peer-to-peer mentoring program that aims to provide support based on the sharing of information and experiences (4) may benefit individuals with early inflammatory arthritis (EIA).

Individuals with EIA often reveal a complex and frustrating journey preceding diagnosis. Symptom fluctuations, symptom normalization and dismissal of their symptoms by healthcare providers (HCPs) are factors contributing to misdiagnosis, delays in referral to rheumatology, and psychological distress and frustration (1). Patients' initial reactions to being diagnosed with EIA range from relief and acceptance to anger, fear, denial, and disbelief (1). Once diagnosed, patients face an overwhelming range of biological, psychological, and social issues such as disease course and severity (both of which are often unpredictable), their ability to cope with pain, as well as uncertainties about social and work issues (5). Like other chronic diseases, responsibilities for daily management gradually shift from HCPs to patients (2). Adapting to EIA is complex (6), and patients require support and guidance early in the disease process so they may learn to live and self-manage their symptoms (2). Patient education and self-management is an arthritis "best practice" and a key clinical practice guideline (7,8,9). Peer support is one strategy to increase patients' knowledge and skills for self-management.

1  
2  
3 Peer support models have been successfully implemented in other chronic health issues  
4 such as cancer (10), (HIV/AIDS (11), and diabetes (12). A peer is someone who shares  
5 common characteristics (e.g., age, sex, disease status) with the individual of interest, such  
6 that the peer can relate to, and empathize with the individual on a level that a non-peer  
7 would be unable (4). Dennis defines peer support as "... the provision of emotional,  
8 appraisal, and informational assistance by a created social network member who  
9 possesses experiential knowledge of a specific behaviour or stressor and has similar  
10 characteristics as the target population" (13). Emotional support includes expressions of  
11 caring, empathy, encouragement and reassurance, and is generally seen to enhance self-  
12 esteem. Appraisal support involves encouraging persistence and optimism for resolving  
13 problems, affirmation of a peer's feelings and behaviours, and reassurance that  
14 frustrations can be handled. Informational support involves providing advice,  
15 suggestions, alternative actions, feedback and factual information (13). All three forms of  
16 support are based on experiential knowledge, rather than formal training (13). Peer  
17 support interventions fit within a social support model (14). Within this model, peer  
18 support could reduce feelings of isolation and loneliness, provide information about  
19 accessing available health services, and promote behaviours that positively improve  
20 personal health, well-being, and health practices (14).  
21  
22  
23  
24  
25  
26  
27  
28  
29  
30  
31  
32  
33  
34  
35  
36  
37  
38  
39  
40  
41  
42  
43  
44  
45  
46  
47

48 Currently, the major support program that patients with EIA can access is the Arthritis  
49 Self-Management Program (ASMP) (15). While it provides emotional and appraisal  
50 support, the standardized outline is not personalizable and the group format limits one-  
51 on-one interactions.  
52  
53  
54  
55  
56  
57  
58  
59  
60



1  
2  
3  
4  
5  
6 We propose that a peer support program with trained mentors with established IA will  
7  
8 assist those with EIA to navigate the diverse set of issues and challenges inherent in EIA,  
9  
10 and help them self-manage their disease. An earlier study exploring the learning and  
11  
12 support needs of patients with IA provides a rationale for using peer support (1) and  
13  
14 previous studies have shown that individuals with rheumatoid arthritis (RA) appear to  
15  
16 benefit from relationships they can rely on for emotional support, information, and  
17  
18 tangible assistance (16). Whether a peer support program may facilitate some of these  
19  
20 benefits in patients with EIA has yet to be explored. This study examines the: 1)  
21  
22 development and 2) feasibility and pilot phases of a peer support intervention using the  
23  
24 2008 Medical Research Council (MRC) *Framework for the Development and Evaluation*  
25  
26 *of Randomized Control Trials for Complex Interventions to Improve Health* (17). The  
27  
28 primary objective is to develop a peer mentor training process and establish the feasibility  
29  
30 and acceptability of a peer support program. Secondary objectives include measuring  
31  
32 changes in various outcomes as a result of this intervention (Figure 1).  
33  
34  
35  
36  
37  
38  
39  
40

## 41 **METHODS**

42  
43 The four phases of the 2008 MRC framework guided this complex intervention: (17)  
44  
45 *development phase*, to establish theoretical underpinnings and modeling to achieve an  
46  
47 understanding of the intervention and its possible effects; *feasibility and piloting phase*:  
48  
49 exploratory trial to test feasibility of key intervention components; *evaluation phase*: to  
50  
51 assess program effectiveness; and *implementation phase*: to examine long-term  
52  
53 implementation and sustainability (Figure 2).  
54  
55  
56  
57  
58  
59  
60

## Development phase

### Identifying the evidence base

A qualitative literature search strategy was developed on peer support and chronic diseases using Medline, EMBASE, CINAHL, and Cochrane Systematic Reviews. Reviewers independently evaluated papers using a quality assessment tool. Using meta-ethnography, a methodology to synthesize qualitative literature (18, 19), we determined how studies were related, translated studies into one another, synthesized translations, and expressed the synthesized ethnography (20). Quantitative studies were reviewed, including a draft from a Cochrane Collaboration protocol (4). An environmental scan was performed and grey literature summarized.

### Modeling

#### *Needs assessment*

A qualitative needs assessment was performed to identify educational preferences and informational, emotional and appraisal support needs of individuals with IA, and to determine the suitability of peer support (1). Semi-structured, one-on-one interviews were performed with patients with IA, their family/friends, and HCPs. Interview audio files, transcripts and field notes were uploaded to a qualitative software package, NVivo 8, for coding and analysis. Themes were identified through constant comparative analysis (21).

#### *Working groups for intervention development*

Three working groups (peer mentor training, peer support program, evaluation) of four to six research team and end users were convened to develop the pilot intervention.

### Expert review

Using snowball recruiting, expert reviewers were nominated by the research team. They reviewed study information and completed a semi-structured questionnaire by e-mail about the proposed training.

**Figure 1** Flow diagram of the peer support intervention program design.

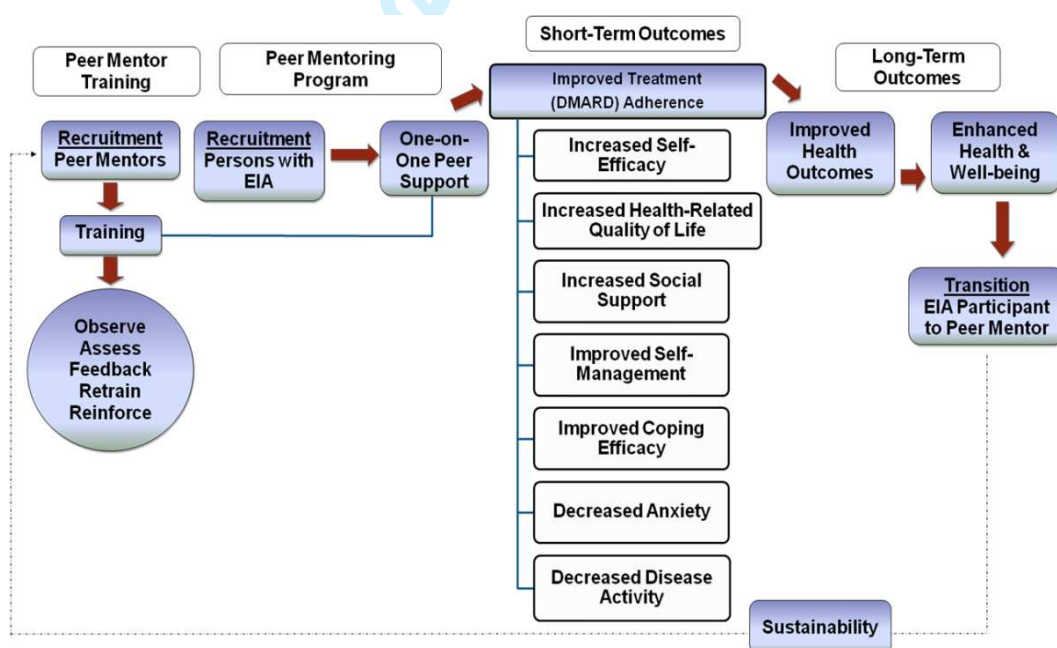

**Figure 2** Flowchart outlining steps in the MRC framework.

### Development Phase

Identifying the evidence base

Modeling – needs assessment, working groups for peer mentor training development, and expert review

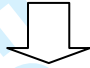

### Feasibility and Piloting Phase

Peer mentor recruitment and training

Mentee recruitment

Exploratory trial – pairing peer mentors with mentees, program delivery, qualitative and quantitative data collection, including process and outcome measures

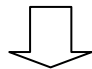

### Future RCT, Evaluation and Implementation

#### Feasibility and piloting phase

Peer mentor recruitment and training

Potential peer mentors were recruited from the Greater Toronto Area (GTA) through: principal investigator's clinic, word-of-mouth, peer mentors, and e-mails from The Arthritis Society. Mentors were selected based on inclusion criteria (Table 1). Eligibility screening occurred by telephone followed by face-to-face interviews.

**Table 1** Inclusion criteria for peer mentors and mentees

---

Peer mentors

---

1  
2  
3  
4  
5  
6  
7  
8  
9  
10  
11  
12  
13  
14  
15  
16  
17  
18  
19  
20  
21  
22  
23  
24  
25  
26  
27  
28  
29  
30  
31  
32  
33  
34  
35  
36  
37  
38  
39  
40  
41  
42  
43  
44  
45  
46  
47  
48  
49  
50  
51  
52  
53  
54  
55  
56  
57  
58  
59  
60

---

Diagnosis of inflammatory arthritis (IA) from a physician

≥ 18 years of age

Disease duration ≥ 2 years

Currently using medications (DMARDS/biologics) for treatment

Completion of the Arthritis Self-Management Program (ASMP) provided by The Arthritis Society and/or similar program

Able to attend scheduled training sessions

Able to take part in ongoing assessment/evaluation activities (self-reported questionnaires; interviews, observation; activity logs)

Able to commit for duration of study (9-12 months)

Willing to provide ongoing one-on-one support to an individual with newly diagnosed IA

Able to speak, understand, read and write English

---

Mentees

---

EIA disease duration 6-52 weeks

At least 3 swollen joints, assessed by the treating rheumatologist, OR

Positive compression test for metacarpophalangeal joints, OR

Positive compression test for metatarsophalangeal joints, OR

At least 30 minutes of morning stiffness

Prescribed a DMARD/biologic by a rheumatologist

Able to speak, understand, read and write English without the aid of a support person

Able to provide informed consent

---

Peer mentors attended four training sessions (18 hours total). Training provided information on EIA, educational/support resources, and opportunities to learn and

1  
2  
3 practice peer support techniques (informational, emotional, appraisal support) and skills  
4  
5 (communication, decision-making, goal-setting). Mentors received two initial training  
6  
7 sessions and an additional session based on feedback from researchers and participants.  
8  
9  
10 Peer mentors received a resource binder with information on arthritis and mentoring  
11  
12 resources and ongoing support from the research team via e-mail, telephone, and in-  
13  
14 person.  
15  
16

#### 17 18 19 20 Mentee recruitment

21  
22 Patients with EIA were recruited from rheumatology clinics in two GTA teaching  
23  
24 hospitals.  
25  
26

#### 27 28 29 Exploratory trial

##### 30 31 *Pairing and delivery*

32  
33 Mentees were paired with peer mentors based on age and work status. The initial meeting  
34  
35 was face-to-face, with subsequent meetings taking place at the discretion of the pair (in-  
36  
37 person or telephone). Dyads met weekly for approximately 12 weeks. Participants were  
38  
39 brought together at the end for debriefing and celebrating.  
40  
41  
42  
43  
44

##### 45 46 *Quantitative data collection*

47  
48 A before-and-after design was used to determine changes over time that can be attributed  
49  
50 to the intervention. Peer mentors' self-efficacy was assessed four time points – baseline  
51  
52 (T1), post-training (T2), immediately after program completion (T3) and three months  
53  
54 post-program (T4). Mentee outcomes data were collected at baseline (T1), immediately  
55  
56  
57  
58  
59  
60

after program completion (T2) and three months post-program (T3) by self-administered questionnaires and clinical assessment. Outcomes are below:

- 1) *Adherence* to DMARD/biologic treatment in EIA patients, determined indirectly through the Morisky scale (22)
- 2) *Self-efficacy* measured by Self-Efficacy for Managing Chronic Disease 6-Item Scale (23, 24)
- 3) Change in *health-related quality of life and anxiety* measured by Arthritis Impact Measurement Scales, 2<sup>nd</sup> edition (AIMS2) and dimension sub-score for anxiety, respectively (25)
- 4) *Coping-efficacy* assessed by Gignac et al.'s method Gignac et al. (26)
- 5) *Clinical disease activity* assessed by a rheumatologist from the research team using Clinical Disease Activity Index (CDAI) score (27)
- 6) *Social support* measured by Medical Outcomes Study Social Support Survey (MOSSS) (28)
- 7) *Self-management* examined by Patient Activation Measure (PAM) (29)

Descriptive statistics and effect sizes were calculated to determine clinically important (>0.3) changes. Effect size, a unitless measurement of treatment effect, was used to measure the effects of the intervention. An effect size of 0.2 is considered small; 0.5 moderate; and 0.8 large (30).

#### *Qualitative data and process measures*

Peer mentors completed a training evaluation questionnaire. Implementation process data was collected to assess acceptability and feasibility. The number and nature of meetings, topics discussed, and problems arising were recorded by peer mentors via activity log.

1  
2  
3 Research staff called mentors weekly for updates. One-on-one interviews with  
4 participants were conducted to determine acceptability and feasibility of procedures and  
5 outcome measures, and gain perspectives on the value of peer support. Key themes were  
6 identified from transcribed data through constant comparison. Mentees' experiences were  
7 explored using a participant diary at three time points.  
8  
9  
10  
11  
12  
13

14  
15  
16  
17 Ethics approval was obtained from research ethics boards at Sunnybrook Health Sciences  
18 Centre and Mount Sinai Hospital, Toronto, Canada. The study was registered at  
19 <http://www.clinicaltrials.gov> (Identification numbers: NCT01054963, NCT01054131).  
20  
21  
22  
23  
24  
25  
26

## 27 RESULTS

### 28 Development phase

29 Identifying the evidence base

30  
31  
32 21,489 abstracts across six chronic diseases were identified. Twenty-five articles were  
33 included in the meta-ethnography. Results are reported elsewhere (20).  
34  
35  
36  
37  
38  
39  
40

41 Key themes identified about peer mentor training were: setting boundaries around peer  
42 mentor roles, ensuring confidentiality, enhancing communication skills, providing  
43 continuing education and support for mentors, and sharing personal experiences to aid in  
44 decision-making. Literature about the delivery of peer support programs highlighted the  
45 importance of peer mentor recruitment, selection/assessment, outcome measures, and  
46 mentee recruitment.  
47  
48  
49  
50  
51  
52  
53  
54  
55  
56  
57  
58  
59  
60



## Modeling

### *Needs assessment*

Peer support was a well-received approach for helping individuals with EIA to cope with concerns arising from their diagnosis. Participants perceived that peer mentoring, if context-driven (paying attention to specific disease phases and individual circumstances) and sensitive to their needs, could be valuable in managing their disease. Results are reported elsewhere (1).

### *Working groups for intervention development*

Each of the working groups met multiple times. Additional members with specific expertise were added as needed to finalize the intervention.

### *Expert review*

Eighteen experts (individuals with IA, HCPs, peer support researchers, representatives of arthritis organizations, educators) provided input into the format/content of the peer mentor training.

## **Feasibility and piloting phase**

### Peer mentor recruitment and training

Twenty-four potential mentors were identified. Twelve were recruited. Nine completed the training and became peer mentors. Three withdrew due to personal illness and/or family issues. All mentors had RA. See Table 2.

## Mentee recruitment

Twenty-nine potential mentees were identified, nine of whom were eligible and enrolled.

One mentee was lost to follow-up. All nine mentees had RA. See Table 2.

**Table 2** Peer mentor and mentee demographics

| Peer mentors (N = 9)     |                        | N |
|--------------------------|------------------------|---|
| Age (years)              | 31-40                  | 1 |
|                          | 41-50                  | 2 |
|                          | 51-60                  | 3 |
|                          | 61-70                  | 3 |
| Sex                      | Female                 | 9 |
|                          | Male                   | 0 |
| Age at diagnosis (years) | <18                    | 1 |
|                          | 18-30                  | 3 |
|                          | 31-40                  | 3 |
|                          | 41-50                  | 0 |
|                          | 51-60                  | 1 |
|                          | 61-70                  | 1 |
| Work status              | Working for pay        | 5 |
|                          | Not working/ Homemaker | 2 |
|                          | Retired                | 2 |
| Mentees (N = 9)          |                        | N |

|                            |                                                     |   |
|----------------------------|-----------------------------------------------------|---|
| Age (years)                | 18-30                                               | 2 |
|                            | 31-50                                               | 2 |
|                            | 51-60                                               | 3 |
|                            | 61-70                                               | 2 |
| Sex                        | Female                                              | 7 |
|                            | Male                                                | 2 |
| Marital status             | Single/Never married                                | 1 |
|                            | Married                                             | 4 |
|                            | Common law/Living with someone                      | 3 |
|                            | Widowed                                             | 1 |
| Living arrangements        | Living alone in house or apartment                  | 2 |
|                            | Living with family or friends in house or apartment | 7 |
| Work status                | Working for pay                                     | 6 |
|                            | Not working/Homemaker                               | 2 |
|                            | Retired                                             | 1 |
| Highest level of education | Some/Completed high school                          | 1 |
|                            | Some/Completed college/university                   | 6 |
|                            | Some/Completed post graduate                        | 2 |

Exploratory trial

*Pairing and delivery*

Nine mentor-mentee pairs participated. All mentors were female resulting in two mixed-gender dyads.

### *Quantitative data collection*

Mentors' reported self-efficacy increased significantly after training completion.

However, these measures dropped below baseline upon program completion with recovery to baseline levels at three months post-program (Table 3).

**Table 3** Peer mentor and mentee results

| Peer mentor self-efficacy scale ratings |    |        |                    |         |             |
|-----------------------------------------|----|--------|--------------------|---------|-------------|
| Peer mentor reported self-efficacy      | N  | Mean   | Standard Deviation | p-value | Effect Size |
| Baseline (T1)                           | 12 | 8.0093 | 1.4122             |         |             |
| Post Training (T2)                      | 9  | 9.1358 | 0.5577             | .008*   | 1.03        |
| End of Program (T3)                     | 8  | 7.2917 | 0.6220             | .161    | 0.42        |
| 3 Months after Program Completion (T4)  | 8  | 7.8818 | 0.5898             | .859    | 0.03        |

\* significant (p<0.05)

  

| Mentees' mean outcome scores at baseline (T1) and program completion (T2) |   |    |    |            |                          |
|---------------------------------------------------------------------------|---|----|----|------------|--------------------------|
| Measurement                                                               | N | T1 | T2 | T1-T2 (SD) | Effect Size T1-T2 (Mean) |
|                                                                           |   |    |    |            |                          |

|                                                               |   |       |       |       |      |
|---------------------------------------------------------------|---|-------|-------|-------|------|
| Medication Adherence (Morisky scale)                          | 8 | 0.78  | 0.63  | 0.53  | 0    |
| Self-Efficacy Scale                                           | 8 | 7.59  | 7.75  | 1.01  | 0.04 |
| Arthritis Impact Measurement Scales (AIMS2) – Short Form (SF) |   |       |       |       |      |
| • AIMS2-SF                                                    | 5 | 30.26 | 28.96 | 1.33  | 0.39 |
| • AIMS2-Physical (/10)                                        | 8 | 8.36  | 8.60  | 1.98  | 0.19 |
| • AIMS2-Symptoms (/10)                                        | 8 | 2.59  | 1.56  | 2.23  | 0.28 |
| • AIMS2-Affect (/10)                                          | 8 | 5.56  | 5.31  | 1.03  | 0.27 |
| • AIMS2-Social (/10)                                          | 8 | 5.76  | 5.47  | 0.93  | 0.47 |
| • AIMS2-Work (/10)                                            | 5 | 7.66  | 8.13  | 2.05  | 0.42 |
| Coping Efficacy (Gignac et al.)                               | 8 | 4.08  | 4.41  | 0.46  | 0.35 |
| Clinical Disease Activity (CDAI)                              | 6 | 9.94  | 5.68  | 3.91  | 0.19 |
| Medical Outcomes Study Social Support Survey (MOSSS)          | 8 | 3.77  | 4.11  | 0.28  | 0.30 |
| Patient Activation Measure (PAM)                              | 8 | 75.80 | 73.11 | 11.75 | 0.22 |

Mentees experienced improvement in overall arthritis impact on health-related quality of life, coping, and social support. Self-reported measures at program completion (12 weeks) showed significant improvements (effect size >0.3) in the overall AIMS2-SF and Social and Work subcomponents. Mentees reported improvements based on Social Support (MOSSS) and Coping Efficacy. There were no significant effects in Disease Activity Measures Index (CDAI), Medication Adherence (Morisky) or Self-Efficacy

1  
2  
3 Scale. None of these measures showed sustained improvement three months post-  
4  
5  
6 program (T3) (Table 3).  
7  
8  
9

10  
11 *Qualitative data and process measures*

12 Average number of meetings was 8.11 (range=6-12). Average length of meetings was  
13  
14 36.90 minutes (range=10-120 minutes). Mode of contact after initial face-to-face meeting  
15  
16 was telephone only for four pairs, with the remaining five dyads using a mix of telephone  
17  
18 and face-to-face.  
19  
20  
21

22  
23  
24 Key themes revealed from the 17 interviews are categorized below:  
25

26  
27 *Mentor-specific experiences*

28  
29 Peer mentors largely appreciated their training; they valued the emotional support content  
30  
31 of the training program and being able to work through simulated scenarios. Mentors  
32  
33 reported personally benefiting from the program. They reported it increased their  
34  
35 knowledge, provided new self-management techniques and coping strategies (PM3, PM4,  
36  
37 PM7, PM9, PM12), reinforced self-management strategies they were familiar with, and  
38  
39 made them realize how far they had come in their disease experience (PM12, PM8).  
40  
41  
42  
43  
44  
45

46 A few mentors experienced challenges (e.g., mentee reluctant to stop consuming alcohol  
47  
48 to take methotrexate (PM7); mentee with problems returning to work after being on long-  
49  
50 term disability (PM8)). These mentors (PM7, PM8) also experienced challenges in  
51  
52 arranging sessions.  
53  
54  
55  
56  
57  
58  
59  
60

### *Mentee-specific experiences*

Emotional and informational support were most commonly reported. One mentee described his mentor as, “a book, as far as I'm concerned, she has more information than I can absorb, really” (EIA8). Informational support was not confined to program resources, but also included mentors' experiential knowledge:

“I would ask her when she encountered bad weather, how were her joints? What did she do about that? ... Can I do something prior to, when you know the weather is coming” (EIA3).

Appraisal and instrumental support were also exchanged. One mentee said:

“It was great being able to sit down and have a normal conversation, but at the same time throw in, oh yeah, I'm thinking about switching to biologics so what's your opinion?” (EIA1).

### *The inter-subjective dynamics of peer support*

Participants' experience of peer support was informed by the unique relationship they forged with their peer. Many participants spoke of having “a connection” with his/her peer. This was facilitated by similarities in personality, age, gender, interests, life stage, position of responsibility at work, diagnosis, disease severity, and similarity of affected joints. “My hands felt like her hands,” said one mentee (EIA4). Four participants faced challenges building rapport due to differences in gender, sexuality, political views and disease stage. Gender differences restricted the type of conversations in one mixed gender dyad. In another dyad, a mentee found herself disassociating from her wheelchair-bound mentor, as she was not able to cope with this:

1  
2  
3 “... I found myself looking at my mentor and going, that's not me, I don't have that, I'm  
4 not going there, I'm not going to be in a wheelchair... or be badly deformed.” (EIA6).  
5  
6  
7  
8  
9

10 While such experiences complicated the work of providing and receiving peer support,  
11 all participants were unequivocal about the need for a peer support program for  
12 individuals with EIA. Mentees spoke about the program as “critical” (EIA1), declaring,  
13 “It can't stop. It can't” (EIA3). Mentors wished that similar peer support interventions  
14  
15  
16  
17  
18  
19  
20 had been available when they were first diagnosed.  
21  
22  
23

## 24 **DISCUSSION**

25  
26  
27 In this study, we piloted a peer support program for patients with EIA using the 2008  
28 MRC framework (17) Information from the development phase, with input from working  
29 groups and expert reviewers and a qualitative needs assessment were used to develop a  
30 pilot peer support intervention. A complementary, inductive approach helped to make  
31 additional sense of learning and support needs, how and why the intervention met (or  
32 failed to meet) these needs and to generate information and hypotheses for testing with  
33 quantitative research methods.  
34  
35  
36  
37  
38  
39  
40  
41  
42  
43  
44  
45

46 A peer support program could help patients with EIA navigate the issues surrounding  
47 their disease. The potential advantage of peer support relates to its focus on impacts on  
48 daily activities and functioning rather than medical information (4). Peer support  
49 encourages sharing of experiences between participants with personalized and flexible  
50 content. Our results suggested that both mentors and mentees perceived benefits from the  
51  
52  
53  
54  
55  
56  
57  
58  
59  
60



1  
2  
3 program. Mentors described largely positive benefits including role satisfaction, and  
4  
5 increase in their own knowledge and self-management techniques.  
6  
7  
8  
9

10  
11 Few qualitative studies to date have rigorously evaluated the effect of peer support on  
12  
13 mentors themselves (31). Our study assessed the self-efficacy of peer mentors. Self-  
14  
15 efficacy is the belief in one's own ability to perform well (32). While self-efficacy scores  
16  
17 of mentors increased after training, scores decreased below baseline after 12 weeks of  
18  
19 mentoring and three months post- program. This raises concerns that being a peer mentor  
20  
21 could be a demanding and stressful experience (33), especially for mentors who  
22  
23 expressed concerns with their mentees. The success of a peer support program also relies  
24  
25 on the skills and retention of peer mentors. Our preliminary results suggest that regular  
26  
27 training and practice sessions may be necessary to maintain mentors' self-efficacy.  
28  
29  
30  
31  
32  
33

34  
35 Mentees showed improvements in a number of outcome measures including the Social  
36  
37 and Work components of AIMS2-SF, Coping Efficacy and Social Support. There was a  
38  
39 small improvement in Affect and Symptom components of AIMS2-SF. Our study did not  
40  
41 demonstrate a significant effect of the intervention on disease activity (CDAI) and this  
42  
43 mirrors previous quantitative studies (34), which found no significant reduction in joint  
44  
45 counts in RA patients who received patient-education interventions. However, the main  
46  
47 thrust behind the study was to develop an individualized support program that was  
48  
49 responsive to the needs of each patient. Thus, improvements in the Coping Efficacy and  
50  
51 Social Support scores are encouraging. The fact that improvements were not sustained  
52  
53 three months post-program would suggest that three months may be insufficient for  
54  
55  
56  
57  
58  
59  
60

1  
2  
3 mentees to develop knowledge and skills to help them adapt to their disease. We know  
4  
5 from education literature that “booster sessions” may be required to sustain knowledge  
6  
7 and skill sets (35), although other studies have questioned their effectiveness (36).  
8  
9

10  
11  
12 Our study did not demonstrate any effect on medication adherence. This reflects previous  
13  
14 data that interventions to increase medication adherence in chronic conditions are  
15  
16 complex, and that a large proportion of patient education interventions in this setting have  
17  
18 been ineffective (37). A recent peer-support intervention for type 2 diabetes also yielded  
19  
20 null results, but participants thought they would benefit from peer support early after  
21  
22 diagnosis (33).  
23  
24  
25  
26  
27  
28

29  
30 A limitation is the small sample size. However, this study was designed as a feasibility  
31  
32 and pilot study. The goal was to determine change over time in the outcome measures  
33  
34 that can be attributed to the intervention and to obtain initial data for planning and  
35  
36 implementing a larger scale study. As such, results from this preliminary pilot are not  
37  
38 meant to be generalized. All trained mentors and mentees had RA, limiting the  
39  
40 generalizability to other types of IA. Matching pairs based on personal and social  
41  
42 characteristics was important. Unfortunately, were unable to match all pairs by gender.  
43  
44 The two mixed gender dyads reported that this may have limited the types of  
45  
46 conversations they had.  
47  
48  
49  
50  
51  
52

53  
54 In summary, this study showed that developing and delivering a peer support program  
55  
56 was acceptable, feasible with modifications, and well-received by peer mentors and  
57  
58  
59  
60

1  
2  
3 mentees. Peers can be instrumental in promoting self-management and improving one's  
4 ability to cope with the diagnosis of a chronic disease. Peers also facilitate social support  
5 and may be a useful adjunct to standard rheumatologic care. The information gleaned  
6 from this study has been incorporated into a randomized, wait-list controlled study now  
7 in progress to further assess the benefits of peer support in EIA management.  
8  
9  
10  
11  
12  
13

14  
15  
16  
17 **Acknowledgements** We would like to thank the research participants for their  
18 contribution to this study. We also recognize the important role of the other members of  
19 the research team for their contribution to this project (Emma Bell, Jennifer Boyle, Nicky  
20 Britten, Mary Cox-Dublanski, Kerry Knickle, Joyce Nyhof-Young, Laure Perrier, Susan  
21 Ross, Joan Sargeant, Ruth Tonon, Peter Tugwell, Fiona Webster).  
22  
23  
24  
25  
26  
27  
28  
29  
30  
31

### 32 **Author Contributions**

33  
34 Mary Bell – Principal Investigator, intervention development, implementation and  
35 evaluation, data analysis, manuscript writing  
36

37  
38 Sharron Sandhu – Co-investigator, intervention development and implementation, data  
39 analysis, manuscript writing  
40  
41

42  
43 Paula Veinot - Project Manager, intervention development, implementation and  
44 evaluation, data analysis, manuscript writing  
45  
46

47  
48 Gayathri Embuldeniya, Research Assistant, intervention development, implementation  
49 and evaluation, data analysis, manuscript writing  
50  
51

52  
53 Sydney Brooks – Co-investigator, intervention development, implementation and  
54 evaluation, data analysis, manuscript writing  
55  
56  
57  
58  
59  
60

1  
2  
3 Joanna Sale – Co-investigator, intervention development, evaluation, manuscript writing

4  
5  
6 Sicong Huang – Medical student, data analysis, manuscript writing

7  
8 Alex Zhao - Medical student, data analysis, manuscript writing

9  
10 Dawn Richards - Research team member/consumer collaborator, intervention  
11  
12 development, implementation and evaluation, manuscript writing

13  
14  
15  
16  
17 **Funding** This received funding from the Canadian Arthritis Network, Canadian Institutes  
18 of Health Research, and Ontario Rehabilitation Research Advisory Network.  
19

20  
21  
22  
23  
24 **Data sharing statement** No additional data available

25  
26  
27  
28  
29 **Competing interests** The authors have no competing interests to declare.  
30  
31  
32  
33  
34  
35  
36  
37  
38  
39  
40  
41  
42  
43  
44  
45  
46  
47  
48  
49  
50  
51  
52  
53  
54  
55  
56  
57  
58  
59  
60

## REFERENCES

1. Tran CSJ, Nyhof-Young J, Embuldeniya G, et al. Exploring the learning and support needs of individuals with inflammatory arthritis. *Univ Toronto Med J* 2012;**89**:88-94.
2. Sakalys JA. Illness behavior in rheumatoid arthritis. *Arthritis Rheum* 1997;**10**:229-237.
3. Branch VK, Lipsky K, Nieman T, et al. Positive impact of an intervention by arthritis patient educators on knowledge and satisfaction of patients in a rheumatology practice. *Arthritis Care Res* 1999;**12**:370-375.
4. Doull M, O'Connor AM, Robinson V, et al. Peer support strategies for improving the health and well-being of individuals with chronic diseases (Protocol). *Cochrane Libr* 2005;**3**:CD005352.
5. Walker JG, Jackson HJ, Littlejohn GO. Models of adjustment to chronic illness: Using the example of rheumatoid arthritis. *Clin Psychol Rev* 2004;**24**:461-488.
6. Pollock SE, Christian BJ, Sands D. Responses to chronic illness: Analysis of psychological and physiological adaptation. *Nurs Res* 1990;**39**:300-304.
7. Combe B, Landewe R, Lukas C, et al. EULAR recommendations for the management of early arthritis: report of a task force of the European Standing Committee for International Clinical Studies Including Therapeutics (ESCISIT). *Ann Rheum Dis* 2007;**66**:34-45.
8. Holbrook AM. Ontario treatment guidelines for osteoarthritis, rheumatoid arthritis, and acute musculoskeletal injury. Toronto, ON: Queen's Printer of Ontario 2000.

- 1  
2  
3 9. Jordan KM, Arden NK, Doherty M, et al. EULAR Recommendations 2003: an  
4  
5 evidence based approach to the management of knee osteoarthritis: Report of a  
6  
7 Task Force of the Standing Committee for International Clinical Studies Including  
8  
9 Therapeutic Trials (ESCISIT). *Ann Rheum Dis* 2003;**62**:1145-55.
- 10  
11  
12 10. Beckmann K, Strassnick K, Abell L, et al. Is a chronic disease self-management  
13  
14 program beneficial to people affected by cancer? *Aust J Prim Health* 2007;**13**:36-  
15  
16 44.
- 17  
18  
19 11. Morisky DE, Ang A, Coly A, et al. A model HIV/AIDS risk reduction programme  
20  
21 in the Philippines: a comprehensive community-based approach through  
22  
23 participatory action research. *Health Promot Int* 2004;**19**:69-76.
- 24  
25  
26 12. Keyserling TC, Samuel-Hodge CD, Ammerman AS, et al. A randomized trial of  
27  
28 an intervention to improve self-care behaviors of African-American women with  
29  
30 type 2 diabetes: impact on physical activity. *Diabetes Care* 2002;**25**:1576-83.
- 31  
32  
33 13. Dennis CL. Peer support within a health care context: A concept analysis. *Int J*  
34  
35 *Nurs Stud* 2003;**40**:321-32.
- 36  
37  
38 14. Cohen S, Gottlieb BH, Underwood LG. Social support measurement and  
39  
40 intervention. In: Cohen S, Gottlieb BH, Underwood LG, eds. *Measuring and*  
41  
42 *intervening in social support*. New York, NY: Oxford University Press 2000:3-28.
- 43  
44  
45 15. Implementation Manual Stanford Self-Management Programs 2008. Palo Alto,  
46  
47 CA: Stanford University 2008 [accessed Aug 2012]. Available from:  
48  
49 [http://patienteducation.stanford.edu/licensing/Implementation\\_Manual2008.pdf](http://patienteducation.stanford.edu/licensing/Implementation_Manual2008.pdf).

- 1  
2  
3  
4  
5  
6  
7  
8  
9  
10  
11  
12  
13  
14  
15  
16  
17  
18  
19  
20  
21  
22  
23  
24  
25  
26  
27  
28  
29  
30  
31  
32  
33  
34  
35  
36  
37  
38  
39  
40  
41  
42  
43  
44  
45  
46  
47  
48  
49  
50  
51  
52  
53  
54  
55  
56  
57  
58  
59  
60
16. Affleck G, Pfeiffer CA, Tennen H, et al. Social support and psychosocial adjustment to rheumatoid arthritis: Quantitative and qualitative findings. *Arthritis Rheum* 1988;**1**:71-77.
  17. Craig P, Dieppe P, Macintyre S, et al. Developing and evaluating complex interventions: the new Medical Research Council guidance. *BMJ* 2008;**337**:a1655.
  18. Noblit GW, Hare RD. Meta-ethnography: Synthesizing qualitative studies. Newbury Park, CA: Sage Publication 1988.
  19. Britten N, Campbell R, Pope C, et al. Using meta ethnography to synthesise qualitative research: a worked example. *J Health Serv Res Policy* 2002;**7**:209-15.
  20. Embuldeniya G, Veinot P, Bell E, et al. (2012, submitted). The experience and impact of chronic disease peer support interventions: A qualitative synthesis. *Patient Educ Couns*.
  21. Strauss A, Corbin J. Basics of qualitative research: Techniques and procedures for developing grounded theory, 3rd ed. Thousand Oaks, CA: Sage Publications 2008.
  22. Morisky DE, Green LW, Levine DM. Concurrent and predictive validity of a self-reported measure of medication adherence. *Med Care* 1986;**24**:67-74.
  23. Lorig K, Chastain RL, Ung E, et al. Development and evaluation of a scale to measure perceived self-efficacy in people with arthritis. *Arthritis Rheum* 1989;**32**:37-44.
  24. Stanford Patient Education Research Center. Chronic disease self-management questionnaire codebook. Palo Alto, CA: Stanford University 2007 [accessed Aug 2012]. Available from:  
<http://patienteducation.stanford.edu/research/cdCodeBook.pdf>.

- 1  
2  
3  
4 25. Meenan RF, Mason JH, Anderson JJ, et al. AIMS2. The content and properties of  
5 a revised and expanded Arthritis Impact Measurement Scales Health Status  
6 Questionnaire. *Arthritis Rheum* 1992;**35**:1-10.  
7  
8  
9  
10 26. Gignac MA, Cott C, Badley EM. Adaptation to chronic illness and disability and  
11 its relationship to perceptions of independence and dependence. *J Gerontol B*  
12 *Psychol Sci Soc Sci* 2000;**55**:362-72.  
13  
14  
15  
16  
17 27. Aletaha D, Nell VPK, Stamm T, et al. Acute phase reactants add little to  
18 composite disease activity indices for rheumatoid arthritis: Validation of a clinical  
19 activity score. *Arth Res Ther* 2005;**7**:R796-806.  
20  
21  
22  
23  
24 28. Sherbourne CD, Stewart AL. The MOS social support survey. *Soc Sci Med*  
25 1991;**32**:705-14.  
26  
27  
28  
29 29. Hibbard JH, Mahoney ER, Stockard J, et al. Development and testing of a short  
30 form of the patient activation measure. *Health Serv Res* 2005;**40**:1918-30.  
31  
32  
33  
34 30. Cohen J. Statistical Power Analysis for the Behavioral Sciences, 2nd ed. Hillsdale,  
35 NJ: Erlbaum 1988.  
36  
37  
38  
39 31. Ebreo A, Feist-Price S, Siewe Y, et al. Effects of peer education on the peer  
40 educators in a school-based HIV prevention program: where should peer education  
41 research go from here? *Health Educ Behav* 2002;**29**:411-43.  
42  
43  
44  
45 32. Bandura A. Self-efficacy: toward a unifying theory of behavioral change. *Psychol*  
46 *Rev* 1977;**84**:191-215.  
47  
48  
49  
50 33. Smith SM, Paul G, Kelly A, et al. Peer support for patients with type 2 diabetes:  
51 cluster randomised control trial. *BMJ* 2011;**342**:d715.  
52  
53  
54  
55  
56  
57  
58  
59  
60



- 1  
2  
3  
4  
5  
6  
7  
8  
9  
10  
11  
12  
13  
14  
15  
16  
17  
18  
19  
20  
21  
22  
23  
24  
25  
26  
27  
28  
29  
30  
31  
32  
33  
34  
35  
36  
37  
38  
39  
40  
41  
42  
43  
44  
45  
46  
47  
48  
49  
50  
51  
52  
53  
54  
55  
56  
57  
58  
59  
60
34. Riemsma RP, Kirwan JR, Taal E, et al. Patient education for adults with rheumatoid arthritis. *Cochrane Database Syst Rev* 2003;**2**:CD003688.
35. Taal E, Rasker JJ, Wiegman O. Group education for rheumatoid arthritis patients. *Semin Arthritis Rheum* 1997;**26**:805-16.
36. Kroese FM, Adriaanse MA, De Ridder DTD. Boosters, anyone? Exploring the added value of booster sessions in a self-management intervention. *Health Educ Res* 2012;doi:10.1093/her/cys062.
37. Haynes RB, Ackloo E, Sahota N, McDonald HP, Yao X. Interventions for enhancing medication adherence. *Cochrane Database Syst Rev* 2008;**2**:CD000011.

1  
2  
3 We have adhered to guidelines for Mixed Methods studies as per:  
4 O'Cathain A, Murphy E, Nicholl J. The quality of mixed methods studies in health services  
5 research. J Health Serv Res Policy. 2008;13(2):92-8. PMID: 18416914.  
6  
7

- 8 • Is the quantitative component feasible? Yes
- 9 • Is the qualitative component feasible? Yes
- 10 • Is the mixed methods design feasible? Yes
- 11 • Have both qualitative and quantitative components been completed? Yes
- 12 • Were some quantitative methods planned but not executed? No
- 13 • Were some qualitative methods planned but not executed? No
- 14 • Did the mixed methods design work in practice? Yes
- 15 • Is the use of mixed methods research justified? Yes
- 16 • Is the design for mixing methods described?
  - 17 ○ Priority Yes
  - 18 ○ Purpose Yes
  - 19 ○ Sequence Yes
  - 20 ○ Stage of integration Yes
- 21 • Is the design clearly communicated? Yes
- 22 • Is the design appropriate for addressing the research questions? Yes
- 23 • Has rigour of the design been considered (proposal) or adhered to (report)? Yes
- 24 • Is the role of each method clear? Yes
- 25 • Is each method described in sufficient detail? Yes
- 26 • Is each method appropriate for addressing the research question? Yes
- 27 • Is the approach to sampling and analysis appropriate for its purpose? Yes
- 28 • Is there expertise among applicants/authors? Yes
- 29 • Is there expertise on the team to undertake each method? Yes
- 30 • Have issues of validity been addressed for each method? Yes
- 31 • Has the rigour of any method been compromised? Yes
- 32 • Is each method sufficiently developed for its purpose? Yes
- 33 • Is the (intended) analysis sufficiently sophisticated? Yes
- 34 • Is the role of each method clear? Yes
- 35 • Is each method described in sufficient detail? Yes
- 36 • Did appropriate members of the team participate in integration? Yes
- 37 • Is there evidence of communication within the team? Yes
- 38 • Has rigour been compromised by the process of integration? No
- 39 • Is there clarity about which results have emerged from which methods? Yes
- 40 • Are inferences appropriate? Yes
- 41 • Are the results of all the methods considered sufficiently in the interpretation? Yes
- 42
- 43
- 44
- 45
- 46
- 47
- 48
- 49
- 50
- 51
- 52
- 53
- 54
- 55
- 56
- 57
- 58
- 59
- 60



**Peer-to-Peer Mentoring for Individuals with Early  
Inflammatory Arthritis: Feasibility Pilot**

|                                    |                                                                                                                                                                                                                                                                                                                                                                                                                                                                                                                                                                                                                                                                                                                                                                                           |
|------------------------------------|-------------------------------------------------------------------------------------------------------------------------------------------------------------------------------------------------------------------------------------------------------------------------------------------------------------------------------------------------------------------------------------------------------------------------------------------------------------------------------------------------------------------------------------------------------------------------------------------------------------------------------------------------------------------------------------------------------------------------------------------------------------------------------------------|
| Journal:                           | <i>BMJ Open</i>                                                                                                                                                                                                                                                                                                                                                                                                                                                                                                                                                                                                                                                                                                                                                                           |
| Manuscript ID:                     | bmjopen-2012-002267.R1                                                                                                                                                                                                                                                                                                                                                                                                                                                                                                                                                                                                                                                                                                                                                                    |
| Article Type:                      | Research                                                                                                                                                                                                                                                                                                                                                                                                                                                                                                                                                                                                                                                                                                                                                                                  |
| Date Submitted by the Author:      | 09-Jan-2013                                                                                                                                                                                                                                                                                                                                                                                                                                                                                                                                                                                                                                                                                                                                                                               |
| Complete List of Authors:          | Sandhu, Sharron; Sunnybrook Health Sciences Centre, Rheumatology<br>Veinot, Paula; Sunnybrook Health Sciences Centre, Rheumatology<br>Embuldeniya, Gayathri; Sunnybrook Health Sciences Centre,<br>Rheumatology<br>Brooks, Sydney; The Arthritis Society, Ontario Division<br>Sale, Joanna; St. Michael's Hospital, Mobility Program Clinical Research<br>Unit; University of Toronto, Health Policy<br>Huang, Sicong; Sunnybrook Health Sciences Centre, Rheumatology;<br>University of Toronto, Medicine<br>Zhao, Alex; Sunnybrook Health Sciences Centre, Rheumatology; University<br>of Toronto, Medicine<br>Richards, Dawn; Canadian Arthritis Network Consumer Advisory Council,<br>Bell, Mary; Sunnybrook Health Sciences Centre, Rheumatology; University<br>of Toronto, Medicine |
| <b>Primary Subject<br>Heading</b>: | Rheumatology                                                                                                                                                                                                                                                                                                                                                                                                                                                                                                                                                                                                                                                                                                                                                                              |
| Secondary Subject Heading:         | Health services research                                                                                                                                                                                                                                                                                                                                                                                                                                                                                                                                                                                                                                                                                                                                                                  |
| Keywords:                          | arthritis, early inflammatory arthritis, health services research, rheumatoid<br>arthritis, Rheumatology < INTERNAL MEDICINE                                                                                                                                                                                                                                                                                                                                                                                                                                                                                                                                                                                                                                                              |
|                                    |                                                                                                                                                                                                                                                                                                                                                                                                                                                                                                                                                                                                                                                                                                                                                                                           |

SCHOLARONE™  
Manuscripts

1  
2  
3 **Peer-to-Peer Mentoring for Individuals with Early Inflammatory Arthritis:**  
4  
5  
6 **Feasibility Pilot**  
7  
8  
9

10 Address correspondence to Dr. Mary J. Bell, Division of Rheumatology, Sunnybrook  
11 Health Sciences Centre, 2075 Bayview Ave., Room M1-401, Toronto, Ontario M4N  
12 3M5, Canada. E-mail: [mary.bell@sunnybrook.ca](mailto:mary.bell@sunnybrook.ca)  
13  
14  
15  
16  
17

18  
19  
20 Sharron Sandhu, MB BCh BAO, MRCP, MScCH, Division of Rheumatology,  
21  
22 Sunnybrook Health Sciences Centre, Toronto, Canada  
23

24 Paula Veinot, MHSc, Division of Rheumatology, Sunnybrook Health Sciences Centre,  
25  
26 Toronto, Canada  
27

28  
29 Gayathri Embuldeniya, PhD, Division of Rheumatology, Sunnybrook Health Sciences  
30  
31 Centre, Toronto, Canada  
32  
33

34 Sydney Brooks, PhD, The Arthritis Society - Ontario Division, Toronto, Ontario, Canada  
35

36 Joanna Sale, PhD, Mobility Program Clinical Research Unit, St. Michael's Hospital,  
37  
38 Toronto, Ontario, Canada; Department of Health Policy, University of Toronto,  
39  
40 Toronto, Canada  
41  
42

43 Sicong Huang, BSc, Division of Rheumatology, Sunnybrook Health Sciences Centre,  
44  
45 Toronto, Canada; Faculty of Medicine, University of Toronto, Toronto, Canada  
46  
47

48 Alex Zhao, BHSc, Division of Rheumatology, Sunnybrook Health Sciences Centre,  
49  
50 Toronto, Canada; Faculty of Medicine, University of Toronto, Toronto, Canada  
51  
52

53 Dawn Richards, PhD, Canadian Arthritis Network Consumer Advisory Council, Toronto,  
54  
55 Ontario, Canada  
56  
57  
58  
59  
60

1  
2  
3 Mary J. Bell, MD, MSc, FRCPC, Division of Rheumatology, Sunnybrook Health  
4  
5 Sciences Centre, Toronto, Canada; Faculty of Medicine, University of Toronto,  
6  
7 Toronto, Canada  
8  
9  
10

11  
12 **Key Indexing Terms:** Arthritis, Early Rheumatoid Arthritis, Health Services Research,  
13  
14 Rheumatoid Arthritis  
15  
16

17  
18  
19 **Word count:** 3544  
20  
21  
22  
23  
24  
25  
26  
27  
28  
29  
30  
31  
32  
33  
34  
35  
36  
37  
38  
39  
40  
41  
42  
43  
44  
45  
46  
47  
48  
49  
50  
51  
52  
53  
54  
55  
56  
57  
58  
59  
60

## ABSTRACT

**Objectives:** To examine the feasibility and potential benefits of early peer support to improve the health and quality of life of individuals with early inflammatory arthritis (EIA).

**Design:** Feasibility study using the 2008 Medical Research Council framework as a theoretical basis. A literature review, environmental scan, and interviews with patients, families, and health-care providers guided the development of peer mentor training sessions and a peer-to-peer mentoring program. Peer mentors were trained and paired with a mentee to receive (face-to-face or telephone) support over 12-weeks.

**Setting:** Two academic teaching hospitals in Toronto, Ontario, Canada.

**Participants:** Nine pairs consisting of one peer mentor and one mentee were matched based on factors such as age and work status.

**Primary outcome measure:** Mentee outcomes of *disease modifying anti-rheumatic drugs (DMARDs)/biologic treatment use, self-efficacy, self-management, health-related quality of life, anxiety, coping-efficacy, social support, and disease activity* were measured using validated tools. Descriptive statistics and effect sizes were calculated to determine clinically important ( $>0.3$ ) changes. Peer mentor *self-efficacy* was assessed using a self-efficacy scale. Interviews conducted with participants examined acceptability and feasibility of procedures and outcome measures, and perspectives on the value of peer support for individuals with EIA. Themes were identified through constant comparison.

**Results:** Mentees experienced improvements in the overall arthritis impact on life, coping efficacy, and social support (effect size $>0.3$ ). Mentees also perceived emotional,

1  
2  
3 informational, appraisal and instrumental support. Mentors also reported benefits and  
4  
5 learned from mentees' fortitude and self-management skills. The training was well-  
6  
7 received by mentors. Their self-efficacy increased significantly after training completion.  
8  
9  
10 Participants' experience of peer support was informed by the unique relationship with  
11  
12 their peer. All participants were unequivocal about the need for peer support for  
13  
14 individuals with EIA.  
15

16  
17 **Conclusions:** The intervention was well-received. Training, peer support program and  
18  
19 outcome measures were demonstrated to be feasible with modifications. Early peer  
20  
21 support may augment current rheumatologic care.  
22  
23

24 **Trial registry:** NCT01054963, NCT01054131  
25  
26  
27  
28  
29  
30  
31  
32  
33  
34  
35  
36  
37  
38  
39  
40  
41  
42  
43  
44  
45  
46  
47  
48  
49  
50  
51  
52  
53  
54  
55  
56  
57  
58  
59  
60

## ARTICLE SUMMARY

### Article focus

- Feasibility study for developing, implementing and evaluating a peer support intervention (peer mentor training peer mentoring program consisting of 12-weeks of face-to-face or telephone meetings to support mentees newly diagnosed with early inflammatory arthritis (EIA).

### Key messages

- Early peer support is feasible and well-received by both mentors and mentees.
- Individuals with EIA may benefit from peer support, and this may augment current rheumatologic care.

### Strengths and limitations of this study

- The study was guided by the 2008 Medical Research Council Framework for Complex Interventions.
- The intervention was well-received and had benefits for both mentors and mentees.
- As rheumatoid arthritis was the diagnosis of all participants, further study is needed to assess benefit of early peer support for other types of inflammatory arthritis.



## INTRODUCTION

Inflammatory arthritis (IA) is a leading cause of functional disability, chronic pain, and psychosocial distress (1,2). Patient self-management, education, and social support networks are encouraged as part of a holistic approach to disease management (3). A peer-to-peer mentoring program that aims to provide support based on the sharing of information and experiences (4) may benefit individuals with early inflammatory arthritis (EIA).

Individuals with EIA often reveal a complex and frustrating journey preceding diagnosis. Symptom fluctuations, symptom normalization and dismissal of their symptoms by healthcare providers (HCPs) are factors contributing to misdiagnosis, delays in referral to rheumatology, and psychological distress and frustration (1). Patients' initial reactions to being diagnosed with EIA range from relief and acceptance to anger, fear, denial, and disbelief (1). Once diagnosed, patients face an overwhelming range of biological, psychological, and social issues such as disease course and severity (both of which are often unpredictable), their ability to cope with pain, as well as uncertainties about social and work issues (5). Like other chronic diseases, responsibilities for daily management gradually shift from HCPs to patients (2). Adapting to EIA is complex (6), and patients require support and guidance early in the disease process so they may learn to live and self-manage their symptoms (2). Patient education and self-management is an arthritis "best practice" and a key clinical practice guideline (7,8,9). Peer support is one strategy to increase patients' knowledge and skills for self-management.

1  
2  
3 Peer support models have been successfully implemented in other chronic health issues  
4 such as cancer (10), HIV/AIDS (11), and diabetes (12). A peer is someone who shares  
5 common characteristics (e.g., age, sex, disease status) with the individual of interest, such  
6 that the peer can relate to, and empathize with the individual on a level that a non-peer  
7 would be unable (4). Dennis defines peer support as "... the provision of emotional,  
8 appraisal, and informational assistance by a created social network member who  
9 possesses experiential knowledge of a specific behaviour or stressor and has similar  
10 characteristics as the target population" (13). Emotional support includes expressions of  
11 caring, empathy, encouragement and reassurance, and is generally seen to enhance self-  
12 esteem. Appraisal support involves encouraging persistence and optimism for resolving  
13 problems, affirmation of a peer's feelings and behaviours, and reassurance that  
14 frustrations can be handled. Informational support involves providing advice,  
15 suggestions, alternative actions, feedback and factual information (13). All three forms of  
16 support are based on experiential knowledge, rather than formal training (13). Peer  
17 support interventions fit within a social support model (14). Within this model, peer  
18 support could reduce feelings of isolation and loneliness, provide information about  
19 accessing available health services, and promote behaviours that positively improve  
20 personal health, well-being, and health practices (14).  
21  
22  
23  
24  
25  
26  
27  
28  
29  
30  
31  
32  
33  
34  
35  
36  
37  
38  
39  
40  
41  
42  
43  
44  
45  
46  
47

48 Currently, the major support program that patients with EIA can access is the Arthritis  
49 Self-Management Program (ASMP) (15). While it provides emotional and appraisal  
50 support, the standardized outline is not personalizable and the group format limits one-  
51 on-one interactions.  
52  
53  
54  
55  
56  
57  
58  
59  
60

1  
2  
3  
4  
5  
6 We propose that a peer support program with trained mentors with established IA will  
7  
8 assist those with EIA to navigate the diverse set of issues and challenges inherent in EIA,  
9  
10 and help them self-manage their disease. An earlier study exploring the learning and  
11  
12 support needs of patients with IA provides a rationale for using peer support (1) and  
13  
14 previous studies have shown that individuals with rheumatoid arthritis (RA) appear to  
15  
16 benefit from relationships they can rely on for emotional support, information, and  
17  
18 tangible assistance (16). Whether a peer support program may facilitate some of these  
19  
20 benefits in patients with EIA has yet to be explored. This study examines the: 1)  
21  
22 development and 2) feasibility and pilot phases of a peer support intervention using the  
23  
24 2008 Medical Research Council (MRC) *Framework for the Development and Evaluation*  
25  
26 *of Randomized Control Trials for Complex Interventions to Improve Health* (17). The  
27  
28 primary objective is to develop a peer mentor training process and establish the feasibility  
29  
30 and acceptability of a peer support program. Secondary objectives include measuring  
31  
32 changes in various outcomes as a result of this intervention (Figure 1). The development  
33  
34 phase of the study has been described elsewhere (20). This paper reports on the feasibility  
35  
36 and acceptability of the peer support program and on the secondary outcome measures.  
37  
38  
39  
40  
41  
42  
43  
44

## 45 46 **METHODS**

47  
48 The four phases of the 2008 MRC framework guided this complex intervention: (17)  
49  
50 *development phase*, to establish theoretical underpinnings and modeling to achieve an  
51  
52 understanding of the intervention and its possible effects; *feasibility and piloting phase*:  
53  
54 exploratory trial to test feasibility of key intervention components; *evaluation phase*: to  
55  
56  
57  
58  
59  
60

1  
2  
3 assess program effectiveness; and *implementation phase*: to examine long-term  
4  
5  
6 implementation and sustainability (Figure 2).  
7  
8  
9

## 10 **Development phase**

### 11 Identifying the evidence base

12  
13 A qualitative literature search strategy was developed on peer support and chronic  
14  
15 diseases using Medline, EMBASE, CINAHL, and Cochrane Systematic Reviews.  
16  
17 Reviewers independently evaluated papers using a quality assessment tool. Using meta-  
18  
19 ethnography, a methodology to synthesize qualitative literature (18, 19), we determined  
20  
21 how studies were related, translated studies into one another, synthesized translations,  
22  
23 and expressed the synthesized ethnography (20). Quantitative studies were reviewed,  
24  
25 including a draft from a Cochrane Collaboration protocol (4). An environmental scan was  
26  
27 performed and grey literature summarized.  
28  
29  
30  
31  
32  
33  
34  
35

### 36 Modeling

#### 37 *Needs assessment*

38  
39 A qualitative needs assessment was performed to identify educational preferences and  
40  
41 informational, emotional and appraisal support needs of individuals with IA, and to  
42  
43 determine the suitability of peer support (1). Semi-structured, one-on-one interviews were  
44  
45 performed with patients with IA, their family/friends, and HCPs. Interview audio files,  
46  
47 transcripts and field notes were uploaded to a qualitative software package, NVivo 8, for  
48  
49 coding and analysis. Themes were identified through constant comparative analysis (21).  
50  
51  
52  
53  
54  
55  
56  
57  
58  
59  
60

*Working groups for intervention development*

Three working groups (peer mentor training, peer support program, evaluation) of four to six research team and end users were convened to develop the pilot intervention.

*Expert review*

Using snowball recruiting, expert reviewers were nominated by the research team. They reviewed study information and completed a semi-structured questionnaire by e-mail about the proposed training.

**Figure 1** Flow diagram of the peer support intervention program design.

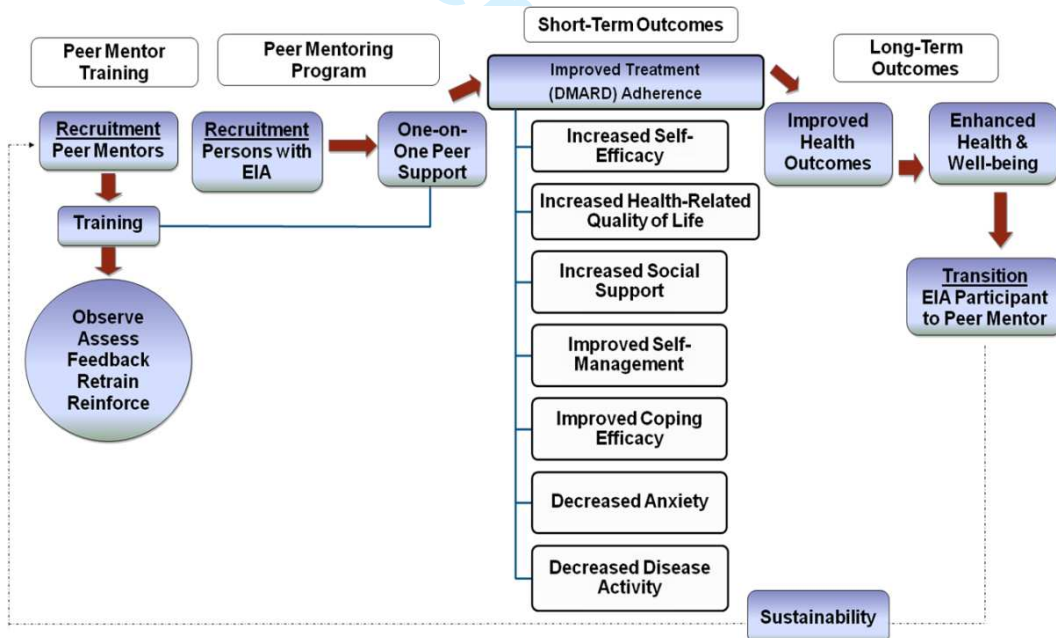

**Figure 2** Flowchart outlining steps in the MRC framework.

### Development Phase

Identifying the evidence base

Modeling – needs assessment, working groups for peer mentor training development, and expert review

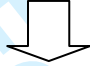

### Feasibility and Piloting Phase

Peer mentor recruitment and training

Mentee recruitment

Exploratory trial – pairing peer mentors with mentees, program delivery, qualitative and quantitative data collection, including process and outcome measures

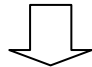

### Future RCT, Evaluation and Implementation

#### Feasibility and piloting phase

Peer mentor recruitment and training

Potential peer mentors were recruited from the Greater Toronto Area (GTA) through: principal investigator's clinic, word-of-mouth, peer mentors, and e-mails from The Arthritis Society. Mentors were selected based on inclusion criteria (Table 1). Eligibility screening occurred by telephone followed by face-to-face interviews.

**Table 1** Inclusion criteria for peer mentors and mentees

---

Peer mentors

---

1  
2  
3  
4  
5  
6  
7  
8  
9  
10  
11  
12  
13  
14  
15  
16  
17  
18  
19  
20  
21  
22  
23  
24  
25  
26  
27  
28  
29  
30  
31  
32  
33  
34  
35  
36  
37  
38  
39  
40  
41  
42  
43  
44  
45  
46  
47  
48  
49  
50  
51  
52  
53  
54  
55  
56  
57  
58  
59  
60

---

Diagnosis of inflammatory arthritis (IA) from a physician

≥ 18 years of age

Disease duration ≥ 2 years

Currently using medications (DMARDS/biologics) for treatment

Completion of the Arthritis Self-Management Program (ASMP) provided by The Arthritis Society and/or similar program

Able to attend scheduled training sessions

Able to take part in ongoing assessment/evaluation activities (self-reported questionnaires; interviews, observation; activity logs)

Able to commit for duration of study (9-12 months)

Willing to provide ongoing one-on-one support to an individual with newly diagnosed IA

Able to speak, understand, read and write English

---

Mentees

---

EIA disease duration 6-52 weeks

At least 3 swollen joints, assessed by the treating rheumatologist, OR

Positive compression test for metacarpophalangeal joints, OR

Positive compression test for metatarsophalangeal joints, OR

At least 30 minutes of morning stiffness

Prescribed a DMARD/biologic by a rheumatologist

Able to speak, understand, read and write English without the aid of a support person

Able to provide informed consent

---

Peer mentors attended four training sessions (18 hours total). Training provided information on EIA, educational/support resources, and opportunities to learn and

1  
2  
3 practice peer support techniques (informational, emotional, appraisal support) and skills  
4  
5 (communication, decision-making, goal-setting). Mentors received two initial training  
6  
7 sessions and an additional session based on feedback from researchers and participants.  
8  
9  
10 Peer mentors received a resource binder with information on arthritis and mentoring  
11  
12 resources and ongoing support from the research team via e-mail, telephone, and in-  
13  
14 person.  
15  
16

#### 17 18 19 20 Mentee recruitment

21  
22 Patients with EIA were recruited from rheumatology clinics in two GTA teaching  
23  
24 hospitals.  
25  
26

#### 27 28 29 Exploratory trial

##### 30 31 *Pairing and delivery*

32  
33 Mentees were paired with peer mentors based on age and work status. The initial meeting  
34  
35 was face-to-face, with subsequent meetings taking place at the discretion of the pair (in-  
36  
37 person or telephone). Dyads met weekly for approximately 12 weeks. Participants were  
38  
39 brought together at the end for debriefing and celebrating.  
40  
41  
42  
43  
44

##### 45 46 *Quantitative data collection*

47  
48 24 potential mentors were identified, of which 12 were eligible and 9 completed training.  
49  
50 29 potential EIA participants were identified, 9 were enrolled and 8 completed the  
51  
52 program (Figure3)  
53  
54  
55  
56  
57  
58  
59  
60



Figure 3: Flow Diagram for Peer Mentor and Mentee Recruitment

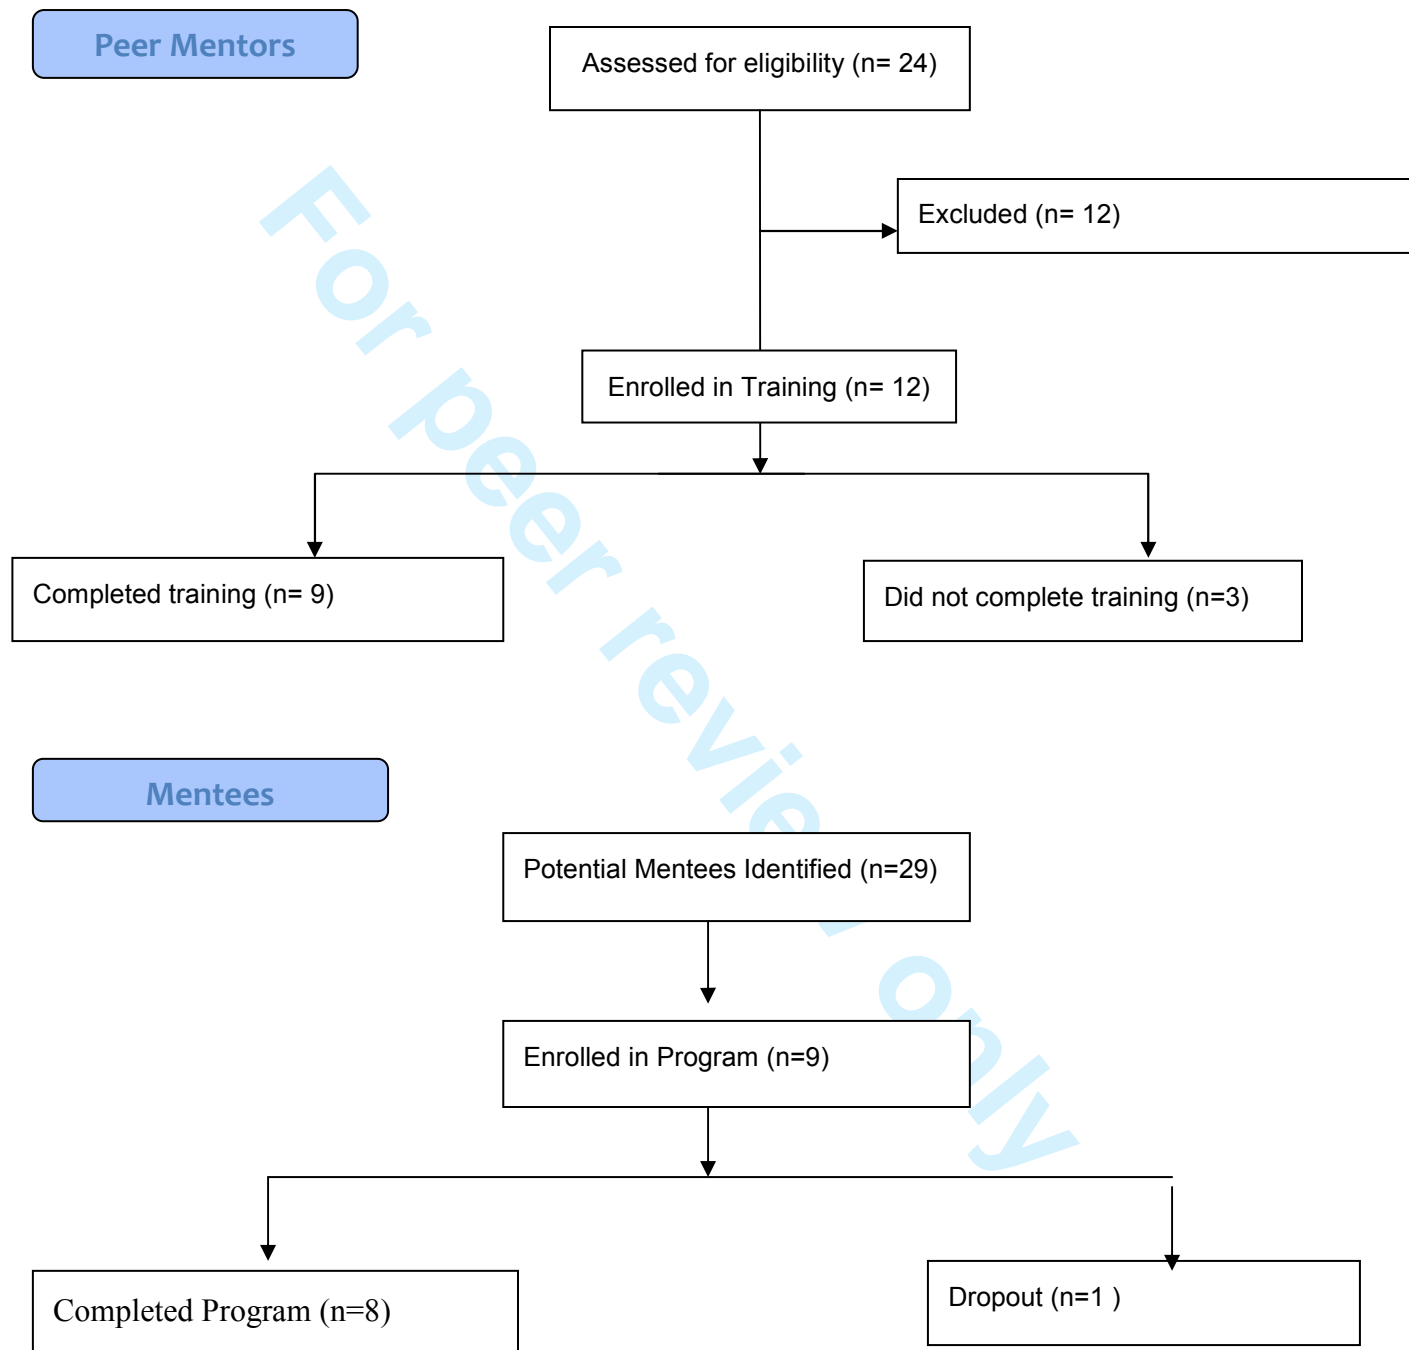

1  
2  
3  
4 A before-and-after design was used to determine changes over time that can be attributed  
5 to the intervention. Peer mentors' self-efficacy was assessed via a self-administered  
6  
7 questionnaire at four time points – baseline (T1), post-training (T2), immediately after  
8  
9 program completion (T3) and three months post-program (T4). Mentee outcomes data  
10  
11 were collected by self-administered questionnaires and clinical assessment at baseline  
12  
13 (T1), immediately after program completion (T2) and three months post-program (T3)..

14  
15  
16  
17  
18 Outcomes are below:

- 19  
20  
21 1) *Adherence* to DMARD/biologic treatment in EIA patients, determined indirectly  
22  
23 through the Morisky scale (22)
- 24  
25  
26 2) *Self-efficacy* measured by Self-Efficacy for Managing Chronic Disease 6-Item Scale (23,  
27  
28 24)
- 29  
30  
31 3) Change in *health-related quality of life and anxiety* measured by Arthritis Impact  
32  
33 Measurement Scales, 2<sup>nd</sup> edition (AIMS2) and dimension sub-score for anxiety,  
34  
35 respectively (25)
- 36  
37  
38 4) *Coping-efficacy* assessed by Gignac et al.'s method Gignac et al. (26)
- 39  
40  
41 5) *Clinical disease activity* assessed by a rheumatologist from the research team  
42  
43 using Clinical Disease Activity Index (CDAI) score (27)
- 44  
45  
46 6) *Social support* measured by Medical Outcomes Study Social Support Survey  
47  
48 (MOSSS) (28)
- 49  
50  
51 7) *Self-management* examined by Patient Activation Measure (PAM) (29)

52  
53  
54 Descriptive statistics and effect sizes were calculated to determine clinically important  
55  
56 (>0.3) changes. Effect size, a unitless measurement of treatment effect, was used to  
57  
58  
59  
60

1  
2  
3 measure the effects of the intervention. An effect size of 0.2 is considered small; 0.5  
4  
5 moderate; and 0.8 large (30).  
6  
7  
8  
9

### 10 *Qualitative data and process measures*

11  
12 Peer mentors completed a training evaluation questionnaire. Implementation process data  
13  
14 was collected to assess acceptability and feasibility. The number and nature of meetings,  
15  
16 topics discussed, and problems arising were recorded by peer mentors via activity log.  
17  
18 Research staff called mentors weekly for updates. One-on-one interviews with  
19  
20 participants were conducted to determine acceptability and feasibility of procedures and  
21  
22 outcome measures, and gain perspectives on the value of peer support. Key themes were  
23  
24 identified from transcribed data through constant comparison. Mentees' experiences were  
25  
26 explored using a participant diary at three time points.  
27  
28  
29  
30  
31  
32  
33

34 Ethics approval was obtained from research ethics boards at Sunnybrook Health Sciences  
35  
36 Centre and Mount Sinai Hospital, Toronto, Canada. The study was registered at  
37  
38 <http://www.clinicaltrials.gov> (Identification numbers: NCT01054963, NCT01054131).  
39  
40  
41  
42

## 43 **RESULTS**

### 44 **Development phase**

#### 45 Identifying the evidence base

46  
47  
48 21,489 abstracts across six chronic diseases were identified. Twenty-five articles were  
49  
50 included in the meta-ethnography. Results are reported elsewhere (20).  
51  
52  
53  
54  
55  
56  
57  
58  
59  
60

1  
2  
3 Key themes identified about peer mentor training were: setting boundaries around peer  
4 mentor roles, ensuring confidentiality, enhancing communication skills, providing  
5 continuing education and support for mentors, and sharing personal experiences to aid in  
6 decision-making. Literature about the delivery of peer support programs highlighted the  
7 importance of peer mentor recruitment, selection/assessment, outcome measures, and  
8 mentee recruitment.  
9  
10  
11  
12  
13  
14  
15  
16

## 17 18 19 20 Modeling

### 21 22 *Needs assessment*

23  
24 Peer support was a well-received approach for helping individuals with EIA to cope with  
25 concerns arising from their diagnosis. Participants perceived that peer mentoring, if  
26 context-driven (paying attention to specific disease phases and individual circumstances)  
27 and sensitive to their needs, could be valuable in managing their disease. Results are  
28 reported elsewhere (1).  
29  
30  
31  
32  
33  
34  
35  
36  
37  
38

### 39 40 *Working groups for intervention development*

41 Each of the working groups met multiple times. Additional members with specific  
42 expertise were added as needed to finalize the intervention.  
43  
44  
45  
46  
47

### 48 49 *Expert review*

50 Eighteen experts (individuals with IA, HCPs, peer support researchers, representatives of  
51 arthritis organizations, educators) provided input into the format/content of the peer  
52 mentor training.  
53  
54  
55  
56  
57  
58  
59  
60

## Feasibility and piloting phase

### Peer mentor recruitment and training

Twenty-four potential mentors were identified. Twelve were recruited. Nine completed the training and became peer mentors. Three withdrew due to personal illness and/or family issues. All mentors had RA. See Table 2.

### Mentee recruitment

Twenty-nine potential mentees were identified, nine of whom were eligible and enrolled. One mentee was lost to follow-up. All nine mentees had RA. See Table 2.

**Table 2** Demographics : Peer mentors, mentees and peer mentors who withdrew

| Peer mentors (N = 9)     |        | N |
|--------------------------|--------|---|
| Age (years)              | 31-40  | 1 |
|                          | 41-50  | 2 |
|                          | 51-60  | 3 |
|                          | 61-70  | 3 |
|                          |        |   |
| Sex                      | Female | 9 |
|                          | Male   | 0 |
| Age at diagnosis (years) | <18    | 1 |
|                          | 18-30  | 3 |
|                          | 31-40  | 3 |

|                     |                                                     |   |
|---------------------|-----------------------------------------------------|---|
|                     | 41-50                                               | 0 |
|                     | 51-60                                               | 1 |
|                     | 61-70                                               | 1 |
| Work status         | Working for pay                                     | 5 |
|                     | Not working/ Homemaker                              | 2 |
|                     | Retired                                             | 2 |
| Mentees (N = 9)     |                                                     | N |
| Age (years)         | 18-30                                               | 2 |
|                     | 31-50                                               | 2 |
|                     | 51-60                                               | 3 |
|                     | 61-70                                               | 2 |
| Sex                 | Female                                              | 7 |
|                     | Male                                                | 2 |
| Marital status      | Single/Never married                                | 1 |
|                     | Married                                             | 4 |
|                     | Common law/Living with someone                      | 3 |
|                     | Widowed                                             | 1 |
| Living arrangements | Living alone in house or apartment                  | 2 |
|                     | Living with family or friends in house or apartment | 7 |
| Work status         | Working for pay                                     | 6 |

|                                   |                                   |   |
|-----------------------------------|-----------------------------------|---|
|                                   | Not working/Homemaker             | 2 |
|                                   | Retired                           | 1 |
| Highest level of education        | Some/Completed high school        | 1 |
|                                   | Some/Completed college/university | 6 |
|                                   | Some/Completed post graduate      | 2 |
| Peer mentors who withdrew (N = 3) |                                   | N |
| Age (years)                       | 41-50                             | 2 |
|                                   | 51-60                             | 1 |
| Age at diagnosis (years)          | <18                               | 1 |
|                                   | 18-30                             | 1 |
|                                   | 41-50                             | 1 |
| Sex                               | Female                            | 3 |
|                                   | Male                              | 0 |
| Diagnosis                         | RA                                | 2 |
|                                   | Psoriatic Arthritis               | 1 |
| Work                              | Working for pay                   | 3 |

Exploratory trial

1  
2  
3 *Pairing and delivery*  
4

5 Nine mentor-mentee pairs participated. All mentors were female resulting in two mixed-  
6  
7  
8 gender dyads.  
9

10  
11  
12 *Quantitative data collection*  
13

14 Mentors' reported self-efficacy increased significantly after training completion.  
15  
16 However, these measures dropped below baseline upon program completion with  
17  
18 recovery to baseline levels at three months post-program (Table 3).  
19  
20  
21  
22  
23

24 **Table 3** Peer mentor and mentee results  
25

26

| Peer mentor self-efficacy scale ratings   |   |      |           |         |             |
|-------------------------------------------|---|------|-----------|---------|-------------|
| Peer mentor reported self-                |   |      | Standard  |         | Effect Size |
| efficacy                                  | N | Mean | Deviation | p-value |             |
| Baseline (T1)                             | 9 | 7.91 | 1.18      |         |             |
| Post Training (T2)                        | 9 | 9.14 | 0.56      | 0.01*   | 1.04        |
| End of Program (T3)                       | 9 | 7.55 | 0.97      | 0.26    | -0.31       |
| 3 Months after Program<br>Completion (T4) | 9 | 7.88 | 0.59      | 0.86    | -0.03       |

27  
28  
29  
30  
31  
32  
33  
34  
35  
36  
37  
38  
39  
40  
41  
42  
43  
44  
45  
46  
47  
48

| Mentees' mean outcome scores at baseline (T1) and program completion (T2) |   |    |    |               |                      |
|---------------------------------------------------------------------------|---|----|----|---------------|----------------------|
| Measurement                                                               | N | T1 | T2 | T1-T2<br>(SD) | Effect Size<br>T1-T2 |

49  
50  
51  
52  
53  
54  
55  
56  
57  
58  
59  
60



|                                                               |   |       |       |       | (Mean) |
|---------------------------------------------------------------|---|-------|-------|-------|--------|
| Medication Adherence (Morisky scale)                          | 8 | 0.78  | 0.63  | 0.53  | 0      |
| Self-Efficacy Scale                                           | 8 | 7.59  | 7.75  | 1.01  | 0.04   |
| Arthritis Impact Measurement Scales (AIMS2) – Short Form (SF) |   |       |       |       |        |
| • AIMS2-SF                                                    | 5 | 30.26 | 28.96 | 1.33  | 0.39   |
| • AIMS2-Physical (/10)                                        | 8 | 8.36  | 8.60  | 1.98  | 0.19   |
| • AIMS2-Symptoms (/10)                                        | 8 | 2.59  | 1.56  | 2.23  | 0.28   |
| • AIMS2-Affect (/10)                                          | 8 | 5.56  | 5.31  | 1.03  | 0.27   |
| • AIMS2-Social (/10)                                          | 8 | 5.76  | 5.47  | 0.93  | 0.47   |
| • AIMS2-Work (/10)                                            | 5 | 7.66  | 8.13  | 2.05  | 0.42   |
| Coping Efficacy (Gignac et al.)                               | 8 | 4.08  | 4.41  | 0.46  | 0.35   |
| Clinical Disease Activity (CDAI)                              | 6 | 9.94  | 5.68  | 3.91  | 0.19   |
| Medical Outcomes Study Social Support Survey (MOSSS)          | 8 | 3.77  | 4.11  | 0.28  | 0.30   |
| Patient Activation Measure (PAM)                              | 8 | 75.80 | 73.11 | 11.75 | 0.22   |

Mentees experienced improvement in overall arthritis impact on health-related quality of life, coping, and social support. Self-reported measures at program completion (12 weeks, T2) showed significant improvements (effect size >0.3) in the overall AIMS2-SF and Social and Work subcomponents. Mentees reported improvements based on Social Support (MOSSS) and Coping Efficacy. There were no significant effects in Disease

1  
2  
3 Activity Measures Index (CDAI), Medication Adherence (Morisky) or Self-Efficacy  
4  
5 Scale. None of these measures showed sustained improvement three months post-  
6  
7 program (T3)..  
8  
9

### 10 11 12 *Qualitative data and process measures*

13  
14  
15 Average number of meetings was 8.11 (range=6-12). Average length of meetings was  
16  
17 36.90 minutes (range=10-120 minutes). Mode of contact after initial face-to-face meeting  
18  
19 was telephone only for four dyads, with the remaining five dyads using a mix of  
20  
21 telephone and face-to-face.  
22  
23  
24

25  
26  
27 Key themes revealed from the 17 interviews are categorized below:  
28

### 29 30 *Mentor-specific experiences*

31  
32 Peer mentors largely appreciated their training; they valued the emotional support content  
33  
34 of the training program and being able to work through simulated scenarios. Mentors  
35  
36 reported personally benefiting from the program. They reported it increased their  
37  
38 knowledge, provided new self-management techniques and coping strategies (PM3, PM4,  
39  
40 PM7, PM9, PM12), reinforced self-management strategies they were familiar with, and  
41  
42 made them realize how far they had come in their disease experience (PM12, PM8).  
43  
44  
45

46  
47  
48 A few mentors experienced challenges (e.g., mentee reluctant to stop consuming alcohol  
49  
50 to take methotrexate (PM7); mentee with problems returning to work after being on long-  
51  
52 term disability (PM8)). These mentors (PM7, PM8) also experienced challenges in  
53  
54 arranging sessions.  
55  
56  
57  
58  
59  
60

### *Mentee-specific experiences*

Emotional and informational supports were most commonly reported. One mentee described his mentor as, “a book, as far as I'm concerned, she has more information than I can absorb, really” (EIA8). Informational support was not confined to program resources, but also included mentors' experiential knowledge:

“I would ask her when she encountered bad weather, how were her joints? What did she do about that? ... Can I do something prior to, when you know the weather is coming” (EIA3).

Appraisal and instrumental support were also exchanged. One mentee said:

“It was great being able to sit down and have a normal conversation, but at the same time throw in, oh yeah, I'm thinking about switching to biologics so what's your opinion?” (EIA1).

### *The inter-subjective dynamics of peer support*

Participants' experience of peer support was informed by the unique relationship they forged with their peer. Many participants spoke of having “a connection” with his/her peer. This was facilitated by similarities in personality, age, gender, interests, life stage, position of responsibility at work, diagnosis, disease severity, and similarity of affected joints. “My hands felt like her hands,” said one mentee (EIA4). Four participants faced challenges building rapport due to differences in gender, sexuality, political views and disease stage. Gender differences restricted the type of conversations in one mixed

1  
2  
3 gender dyad. In another dyad, a mentee found herself disassociating from her wheelchair-  
4  
5 bound mentor, as she was not able to cope with this:  
6

7  
8 “... I found myself looking at my mentor and going, that's not me, I don't have that, I'm  
9  
10 not going there, I'm not going to be in a wheelchair... or be badly deformed.” (EIA6).  
11

12  
13  
14 While such experiences complicated the work of providing and receiving peer support,  
15  
16 all participants were unequivocal about the need for a peer support program for  
17  
18 individuals with EIA. Mentees spoke about the program as “critical” (EIA1), declaring,  
19  
20 “It can't stop. It can't” (EIA3). Mentors wished that similar peer support interventions  
21  
22 had been available when they were first diagnosed.  
23  
24  
25  
26  
27  
28

## 29 **DISCUSSION**

30  
31 In this study, we piloted a peer support program for patients with EIA using the 2008  
32  
33 MRC framework (17). Information from the development phase, with input from  
34  
35 working groups and expert reviewers and a qualitative needs assessment were used to  
36  
37 develop a pilot peer support intervention. A complementary, inductive approach helped  
38  
39 to make additional sense of learning and support needs, how and why the intervention  
40  
41 met (or failed to meet) these needs and to generate information and hypotheses for testing  
42  
43 with quantitative research methods.  
44  
45  
46  
47  
48  
49

50  
51 A peer support program could help patients with EIA navigate the issues surrounding  
52  
53 their disease. The potential advantage of peer support relates to its focus on impacts on  
54  
55 daily activities and functioning rather than medical information (4). Peer support  
56  
57  
58  
59  
60

1  
2  
3 encourages sharing of experiences between participants with personalized and flexible  
4 content. Our results suggested that both mentors and mentees perceived benefits from the  
5 program. Mentors described largely positive benefits including role satisfaction, and  
6 increase in their own knowledge and self-management techniques.  
7  
8  
9  
10  
11

12  
13  
14  
15 Few qualitative studies to date have rigorously evaluated the effect of peer support on  
16 mentors themselves (31). Our study assessed the self-efficacy of peer mentors. Self-  
17 efficacy is the belief in one's own ability to perform well (32). While self-efficacy scores  
18 of mentors increased after training, scores decreased below baseline after 12 weeks of  
19 mentoring and three months post- program. This raises concerns that being a peer mentor  
20 could be a demanding and stressful experience (33), especially for mentors who  
21 expressed concerns with their mentees. The success of a peer support program also relies  
22 on the skills and retention of peer mentors. Our preliminary results suggest that regular  
23 training and practice sessions may be necessary to maintain mentors' self-efficacy.  
24  
25  
26  
27  
28  
29  
30  
31  
32  
33  
34  
35  
36  
37  
38

39 Mentees showed improvements in a number of outcome measures including the Social  
40 and Work components of AIMS2-SF, Coping Efficacy and Social Support. There was a  
41 small improvement in Affect and Symptom components of AIMS2-SF. Our study did not  
42 demonstrate a significant effect of the intervention on disease activity (CDAI) and this  
43 mirrors previous quantitative studies (34), which found no significant reduction in joint  
44 counts in RA patients who received patient-education interventions. However, the main  
45 thrust behind the study was to develop an individualized support program that was  
46 responsive to the needs of each patient. Thus, improvements in the Coping Efficacy and  
47  
48  
49  
50  
51  
52  
53  
54  
55  
56  
57  
58  
59  
60

1  
2  
3 Social Support scores are encouraging. The fact that improvements were not sustained  
4  
5 three months post-program would suggest that three months may be insufficient for  
6  
7 mentees to develop knowledge and skills to help them adapt to their disease. We know  
8  
9 from education literature that “booster sessions” may be required to sustain knowledge  
10  
11 and skill sets (35), although other studies have questioned their effectiveness (36).  
12  
13  
14

15  
16  
17 Our study did not demonstrate any effect on medication adherence. This reflects previous  
18  
19 data that interventions to increase medication adherence in chronic conditions are  
20  
21 complex, and that a large proportion of patient education interventions in this setting have  
22  
23 been ineffective (37). A recent peer-support intervention for type 2 diabetes also yielded  
24  
25 null results, but participants thought they would benefit from peer support early after  
26  
27 diagnosis (33).  
28  
29  
30  
31

32  
33  
34 A limitation is the small sample size. Also, there was no control group in this study.  
35  
36 However, this study was designed as a feasibility and pilot study. The goal was to to  
37  
38 obtain initial data for planning and implementing a larger scale study. As such, results  
39  
40 from this preliminary pilot are not meant to be generalized. In addition, all trained  
41  
42 mentors and mentees had RA, limiting the generalizability to other types of IA. Matching  
43  
44 pairs based on personal and social characteristics was important but unfortunately, were  
45  
46 unable to match all pairs by gender. The two mixed gender dyads reported that this may  
47  
48 have limited the types of conversations they had.  
49  
50  
51  
52  
53  
54  
55  
56  
57  
58  
59  
60

1  
2  
3 In summary, this study showed that developing and delivering a peer support program  
4 was acceptable, feasible with modifications, and well-received by peer mentors and  
5  
6  
7  
8  
9  
10  
11  
12  
13  
14  
15  
16  
17  
18  
19  
20  
21  
22  
23  
24  
25  
26  
27  
28  
29  
30  
31  
32  
33  
34  
35  
36  
37  
38  
39  
40  
41  
42  
43  
44  
45  
46  
47  
48  
49  
50  
51  
52  
53  
54  
55  
56  
57  
58  
59  
60

In summary, this study showed that developing and delivering a peer support program was acceptable, feasible with modifications, and well-received by peer mentors and mentees. Peers can be instrumental in promoting self-management and improving one's ability to cope with the diagnosis of a chronic disease. Peers also facilitate social support and may be a useful adjunct to standard rheumatologic care. The information gleaned from this study has been incorporated into a randomized, wait-list controlled study comparing the "peer support program" with a "standard care" control group to further assess the benefits of peer support in EIA management.

**Acknowledgements** We would like to thank the research participants for their contribution to this study. We also recognize the important role of the other members of the research team for their contribution to this project (Emma Bell, Jennifer Boyle, Nicky Britten, Mary Cox-Dublanski, Kerry Knickle, Joyce Nyhof-Young, Laure Perrier, Susan Ross, Joan Sargeant, Ruth Tonon, Peter Tugwell, Fiona Webster).

#### **Author Contributions**

Mary Bell – Principal Investigator, intervention development, implementation and

evaluation, data analysis, manuscript writing

Sharron Sandhu – Co-investigator, intervention development and implementation, data

analysis, manuscript writing

Paula Veinot - Intervention development, implementation and evaluation, data analysis,

manuscript writing

1  
2  
3 Gayathri Embuldeniya - Intervention development, implementation and evaluation, data  
4  
5 analysis, manuscript writing  
6  
7

8 Sydney Brooks – Co-investigator, intervention development, implementation and  
9  
10 evaluation, data analysis, manuscript writing  
11

12 Joanna Sale – Co-investigator, intervention development, evaluation, manuscript writing  
13

14 Sicong Huang – Data analysis, manuscript writing  
15

16 Alex Zhao - Data analysis, manuscript writing  
17

18 Dawn Richards - Intervention development, implementation and evaluation, manuscript  
19  
20 writing  
21  
22

23  
24 **All authors approved the final version for publication**  
25  
26

27  
28  
29 **Funding** This received funding from the Canadian Arthritis Network, Canadian Institutes  
30  
31 of Health Research, and Ontario Rehabilitation Research Advisory Network.  
32  
33

34  
35  
36 **Data sharing statement** No additional data available  
37  
38

39  
40  
41 **Competing interests** The authors have no competing interests to declare.  
42  
43  
44  
45  
46  
47  
48  
49  
50  
51  
52  
53  
54  
55  
56  
57  
58  
59  
60



## REFERENCES

1. Tran CSJ, Nyhof-Young J, Embuldeniya G, et al. Exploring the learning and support needs of individuals with inflammatory arthritis. *Univ Toronto Med J* 2012;**89**:88-94.
2. Sakalys JA. Illness behavior in rheumatoid arthritis. *Arthritis Rheum* 1997;**10**:229-237.
3. Branch VK, Lipsky K, Nieman T, et al. Positive impact of an intervention by arthritis patient educators on knowledge and satisfaction of patients in a rheumatology practice. *Arthritis Care Res* 1999;**12**:370-375.
4. Doull M, O'Connor AM, Robinson V, et al. Peer support strategies for improving the health and well-being of individuals with chronic diseases (Protocol). *Cochrane Libr* 2005;**3**:CD005352.
5. Walker JG, Jackson HJ, Littlejohn GO. Models of adjustment to chronic illness: Using the example of rheumatoid arthritis. *Clin Psychol Rev* 2004;**24**:461-488.
6. Pollock SE, Christian BJ, Sands D. Responses to chronic illness: Analysis of psychological and physiological adaptation. *Nurs Res* 1990;**39**:300-304.
7. Combe B, Landewe R, Lukas C, et al. EULAR recommendations for the management of early arthritis: report of a task force of the European Standing Committee for International Clinical Studies Including Therapeutics (ESCISIT). *Ann Rheum Dis* 2007;**66**:34-45.
8. Holbrook AM. Ontario treatment guidelines for osteoarthritis, rheumatoid arthritis, and acute musculoskeletal injury. Toronto, ON: Queen's Printer of Ontario 2000.

- 1  
2  
3 9. Jordan KM, Arden NK, Doherty M, et al. EULAR Recommendations 2003: an  
4  
5 evidence based approach to the management of knee osteoarthritis: Report of a  
6  
7 Task Force of the Standing Committee for International Clinical Studies Including  
8  
9 Therapeutic Trials (ESCISIT). *Ann Rheum Dis* 2003;**62**:1145-55.
- 10  
11  
12 10. Beckmann K, Strassnick K, Abell L, et al. Is a chronic disease self-management  
13  
14 program beneficial to people affected by cancer? *Aust J Prim Health* 2007;**13**:36-  
15  
16 44.
- 17  
18  
19 11. Morisky DE, Ang A, Coly A, et al. A model HIV/AIDS risk reduction programme  
20  
21 in the Philippines: a comprehensive community-based approach through  
22  
23 participatory action research. *Health Promot Int* 2004;**19**:69-76.
- 24  
25  
26 12. Keyserling TC, Samuel-Hodge CD, Ammerman AS, et al. A randomized trial of  
27  
28 an intervention to improve self-care behaviors of African-American women with  
29  
30 type 2 diabetes: impact on physical activity. *Diabetes Care* 2002;**25**:1576-83.
- 31  
32  
33 13. Dennis CL. Peer support within a health care context: A concept analysis. *Int J*  
34  
35 *Nurs Stud* 2003;**40**:321-32.
- 36  
37  
38 14. Cohen S, Gottlieb BH, Underwood LG. Social support measurement and  
39  
40 intervention. In: Cohen S, Gottlieb BH, Underwood LG, eds. *Measuring and*  
41  
42 *intervening in social support*. New York, NY: Oxford University Press 2000:3-28.
- 43  
44  
45 15. *Implementation Manual Stanford Self-Management Programs* 2008. Palo Alto,  
46  
47 CA: Stanford University 2008 [accessed Aug 2012]. Available from:  
48  
49 [http://patienteducation.stanford.edu/licensing/Implementation\\_Manual2008.pdf](http://patienteducation.stanford.edu/licensing/Implementation_Manual2008.pdf).

- 1  
2  
3  
4  
5  
6  
7  
8  
9  
10  
11  
12  
13  
14  
15  
16  
17  
18  
19  
20  
21  
22  
23  
24  
25  
26  
27  
28  
29  
30  
31  
32  
33  
34  
35  
36  
37  
38  
39  
40  
41  
42  
43  
44  
45  
46  
47  
48  
49  
50  
51  
52  
53  
54  
55  
56  
57  
58  
59  
60
16. Affleck G, Pfeiffer CA, Tennen H, et al. Social support and psychosocial adjustment to rheumatoid arthritis: Quantitative and qualitative findings. *Arthritis Rheum* 1988;**1**:71-77.
  17. Craig P, Dieppe P, Macintyre S, et al. Developing and evaluating complex interventions: the new Medical Research Council guidance. *BMJ* 2008;**337**:a1655.
  18. Noblit GW, Hare RD. Meta-ethnography: Synthesizing qualitative studies. Newbury Park, CA: Sage Publication 1988.
  19. Britten N, Campbell R, Pope C, et al. Using meta ethnography to synthesise qualitative research: a worked example. *J Health Serv Res Policy* 2002;**7**:209-15.
  20. Embuldeniya G, Veinot P, Bell E, et al. (2012, submitted). The experience and impact of chronic disease peer support interventions: A qualitative synthesis. *Patient Educ Couns*.
  21. Strauss A, Corbin J. Basics of qualitative research: Techniques and procedures for developing grounded theory, 3rd ed. Thousand Oaks, CA: Sage Publications 2008.
  22. Morisky DE, Green LW, Levine DM. Concurrent and predictive validity of a self-reported measure of medication adherence. *Med Care* 1986;**24**:67-74.
  23. Lorig K, Chastain RL, Ung E, et al. Development and evaluation of a scale to measure perceived self-efficacy in people with arthritis. *Arthritis Rheum* 1989;**32**:37-44.
  24. Stanford Patient Education Research Center. Chronic disease self-management questionnaire codebook. Palo Alto, CA: Stanford University 2007 [accessed Aug 2012]. Available from: <http://patienteducation.stanford.edu/research/cdCodeBook.pdf>.

- 1  
2  
3  
4 25. Meenan RF, Mason JH, Anderson JJ, et al. AIMS2. The content and properties of  
5 a revised and expanded Arthritis Impact Measurement Scales Health Status  
6 Questionnaire. *Arthritis Rheum* 1992;**35**:1-10.  
7  
8  
9  
10  
11 26. Gignac MA, Cott C, Badley EM. Adaptation to chronic illness and disability and  
12 its relationship to perceptions of independence and dependence. *J Gerontol B*  
13 *Psychol Sci Soc Sci* 2000;**55**:362-72.  
14  
15  
16  
17  
18 27. Aletaha D, Nell VPK, Stamm T, et al. Acute phase reactants add little to  
19 composite disease activity indices for rheumatoid arthritis: Validation of a clinical  
20 activity score. *Arth Res Ther* 2005;**7**:R796-806.  
21  
22  
23  
24  
25 28. Sherbourne CD, Stewart AL. The MOS social support survey. *Soc Sci Med*  
26 1991;**32**:705-14.  
27  
28  
29  
30 29. Hibbard JH, Mahoney ER, Stockard J, et al. Development and testing of a short  
31 form of the patient activation measure. *Health Serv Res* 2005;**40**:1918-30.  
32  
33  
34  
35 30. Cohen J. Statistical Power Analysis for the Behavioral Sciences, 2nd ed. Hillsdale,  
36 NJ: Erlbaum 1988.  
37  
38  
39  
40 31. Ebreo A, Feist-Price S, Siewe Y, et al. Effects of peer education on the peer  
41 educators in a school-based HIV prevention program: where should peer education  
42 research go from here? *Health Educ Behav* 2002;**29**:411-43.  
43  
44  
45  
46 32. Bandura A. Self-efficacy: toward a unifying theory of behavioral change. *Psychol*  
47 *Rev* 1977;**84**:191-215.  
48  
49  
50  
51 33. Smith SM, Paul G, Kelly A, et al. Peer support for patients with type 2 diabetes:  
52 cluster randomised control trial. *BMJ* 2011;**342**:d715.  
53  
54  
55  
56  
57  
58  
59  
60

- 1  
2  
3  
4  
5  
6  
7  
8  
9  
10  
11  
12  
13  
14  
15  
16  
17  
18  
19  
20  
21  
22  
23  
24  
25  
26  
27  
28  
29  
30  
31  
32  
33  
34  
35  
36  
37  
38  
39  
40  
41  
42  
43  
44  
45  
46  
47  
48  
49  
50  
51  
52  
53  
54  
55  
56  
57  
58  
59  
60
34. Riemsma RP, Kirwan JR, Taal E, et al. Patient education for adults with rheumatoid arthritis. *Cochrane Database Syst Rev* 2003;**2**:CD003688.
35. Taal E, Rasker JJ, Wiegman O. Group education for rheumatoid arthritis patients. *Semin Arthritis Rheum* 1997;**26**:805-16.
36. Kroese FM, Adriaanse MA, De Ridder DTD. Boosters, anyone? Exploring the added value of booster sessions in a self-management intervention. *Health Educ Res* 2012;doi:10.1093/her/cys062.
37. Haynes RB, Ackloo E, Sahota N, McDonald HP, Yao X. Interventions for enhancing medication adherence. *Cochrane Database Syst Rev* 2008;**2**:CD000011.

1  
2  
3  
4  
5  
6  
7  
8 **Peer-to-Peer Mentoring for Individuals with Early Inflammatory Arthritis:**

9  
10 **Feasibility Pilot**

11  
12  
13  
14 Address correspondence to Dr. Mary J. Bell, Division of Rheumatology, Sunnybrook  
15 Health Sciences Centre, 2075 Bayview Ave., Room M1-401, Toronto, Ontario M4N  
16 3M5, Canada. E-mail: [mary.bell@sunnybrook.ca](mailto:mary.bell@sunnybrook.ca)  
17  
18

19  
20  
21 Sharron Sandhu, MB BCh BAO, MRCP, MScCH, Division of Rheumatology,  
22 Sunnybrook Health Sciences Centre, Toronto, Canada  
23

24  
25 Paula Veinot, MHSc, Division of Rheumatology, Sunnybrook Health Sciences Centre,  
26 Toronto, Canada  
27

28  
29 Gayathri Embuldeniya, PhD, Division of Rheumatology, Sunnybrook Health Sciences  
30 Centre, Toronto, Canada  
31

32  
33 Sydney Brooks, PhD, The Arthritis Society - Ontario Division, Toronto, Ontario, Canada  
34

35  
36 Joanna Sale, PhD, Mobility Program Clinical Research Unit, St. Michael's Hospital,  
37 Toronto, Ontario, Canada; Department of Health Policy, University of Toronto,  
38 Toronto, Canada  
39

40  
41 Sicong Huang, BSc, Division of Rheumatology, Sunnybrook Health Sciences Centre,  
42 Toronto, Canada; Faculty of Medicine, University of Toronto, Toronto, Canada  
43

44  
45 Alex Zhao, BHSc, Division of Rheumatology, Sunnybrook Health Sciences Centre,  
46 Toronto, Canada; Faculty of Medicine, University of Toronto, Toronto, Canada  
47

48  
49 Dawn Richards, PhD, Canadian Arthritis Network Consumer Advisory Council, Toronto,  
50 Ontario, Canada  
51

1  
2  
3  
4  
5  
6  
7  
8 Mary J. Bell, MD, MSc, FRCPC, Division of Rheumatology, Sunnybrook Health  
9  
10 Sciences Centre, Toronto, Canada; Faculty of Medicine, University of Toronto,  
11  
12 Toronto, Canada  
13

14  
15  
16 **Key Indexing Terms:** Arthritis, Early Rheumatoid Arthritis, Health Services Research,  
17  
18 Rheumatoid Arthritis  
19

20  
21  
22 **Word count:** ~~3090~~3544  
23  
24  
25  
26  
27  
28  
29  
30  
31  
32  
33  
34  
35  
36  
37  
38  
39  
40  
41  
42  
43  
44  
45  
46  
47  
48  
49  
50  
51  
52  
53  
54  
55  
56  
57  
58  
59  
60

**ABSTRACT**

**Objectives:** To examine the feasibility and potential benefits of early peer support to improve the health and quality of life of individuals with early inflammatory arthritis (EIA).

**Design:** Feasibility study using the 2008 Medical Research Council framework as a theoretical basis. A literature review, environmental scan, and interviews with patients, families, and health-care providers guided the development of peer mentor training sessions and a peer-to-peer mentoring program. Peer mentors were trained and paired with a mentee to receive (face-to-face or telephone) support over 12-weeks.

**Setting:** Two academic teaching hospitals in Toronto, Ontario, Canada.

**Participants:** Nine pairs consisting of one peer mentor and one mentee were matched based on factors such as age and work status.

**Primary outcome measure:** Mentee outcomes of *disease modifying anti-rheumatic drugs (DMARDs)/biologic treatment use, self-efficacy, self-management, health-related quality of life, anxiety, coping-efficacy, social support, and disease activity* were measured using validated tools. Descriptive statistics and effect sizes were calculated to determine clinically important ( $>0.3$ ) changes. Peer mentor *self-efficacy* was assessed using a self-efficacy scale. Interviews conducted with participants examined acceptability and feasibility of procedures and outcome measures, and perspectives on the value of peer support for individuals with EIA. Themes were identified through constant comparison.

**Results:** Mentees experienced improvements in the overall arthritis impact on life, coping efficacy, and social support (effect size $>0.3$ ). Mentees also perceived emotional,



1  
2  
3  
4  
5  
6  
7  
8 informational, appraisal and instrumental support. Mentors also reported benefits and  
9 learned from mentees' fortitude and self-management skills. The training was well-  
10 received by mentors. Their self-efficacy increased significantly after training completion.  
11  
12 Participants' experience of peer support was informed by the unique relationship with  
13 their peer. All participants were unequivocal about the need for peer support for  
14 individuals with EIA.  
15  
16  
17  
18  
19

20 **Conclusions:** The intervention was well-received. Training, peer support program and  
21 outcome measures were demonstrated to be feasible with modifications. Early peer  
22 support may augment current rheumatologic care.  
23  
24

25 **Trial registry:** NCT01054963, NCT01054131  
26  
27  
28  
29  
30  
31  
32  
33  
34  
35  
36  
37  
38  
39  
40  
41  
42  
43  
44  
45  
46  
47  
48  
49  
50  
51  
52  
53  
54

## ARTICLE SUMMARY

### Article focus

- Feasibility study for developing, implementing and evaluating a peer support intervention (peer mentor training peer mentoring program consisting of 12-weeks of face-to-face or telephone meetings to support mentees newly diagnosed with early inflammatory arthritis (EIA).

### Key messages

- Early peer support is feasible and well-received by both mentors and mentees.
- Individuals with EIA may benefit from peer support, and this may augment current rheumatologic care.

### Strengths and limitations of this study

- The study was guided by the 2008 Medical Research Council Framework for Complex Interventions.
- The intervention was well-received and had benefits for both mentors and mentees.
- As rheumatoid arthritis was the diagnosis of all participants, further study is needed to assess benefit of early peer support for other types of inflammatory arthritis.

## INTRODUCTION

Inflammatory arthritis (IA) is a leading cause of functional disability, chronic pain, and psychosocial distress (1,2). Patient self-management, education, and social support networks are encouraged as part of a holistic approach to disease management (3). A peer-to-peer mentoring program that aims to provide support based on the sharing of information and experiences (4) may benefit individuals with early inflammatory arthritis (EIA).

Individuals with EIA often reveal a complex and frustrating journey preceding diagnosis. Symptom fluctuations, symptom normalization and dismissal of their symptoms by healthcare providers (HCPs) are factors contributing to misdiagnosis, delays in referral to rheumatology, and psychological distress and frustration (1). Patients' initial reactions to being diagnosed with EIA range from relief and acceptance to anger, fear, denial, and disbelief (1). Once diagnosed, patients face an overwhelming range of biological, psychological, and social issues such as disease course and severity (both of which are often unpredictable), their ability to cope with pain, as well as uncertainties about social and work issues (5). Like other chronic diseases, responsibilities for daily management gradually shift from HCPs to patients (2). Adapting to EIA is complex (6), and patients require support and guidance early in the disease process so they may learn to live and self-manage their symptoms (2). Patient education and self-management is an arthritis "best practice" and a key clinical practice guideline (7,8,9). Peer support is one strategy to increase patients' knowledge and skills for self-management.

1  
2  
3  
4  
5  
6  
7  
8 Peer support models have been successfully implemented in other chronic health issues  
9 such as cancer (10), HIV/AIDS (11), and diabetes (12). A peer is someone who shares  
10 common characteristics (e.g., age, sex, disease status) with the individual of interest, such  
11 that the peer can relate to, and empathize with the individual on a level that a non-peer  
12 would be unable (4). Dennis defines peer support as "... the provision of emotional,  
13 appraisal, and informational assistance by a created social network member who  
14 possesses experiential knowledge of a specific behaviour or stressor and has similar  
15 characteristics as the target population" (13). Emotional support includes expressions of  
16 caring, empathy, encouragement and reassurance, and is generally seen to enhance self-  
17 esteem. Appraisal support involves encouraging persistence and optimism for resolving  
18 problems, affirmation of a peer's feelings and behaviours, and reassurance that  
19 frustrations can be handled. Informational support involves providing advice,  
20 suggestions, alternative actions, feedback and factual information (13). All three forms of  
21 support are based on experiential knowledge, rather than formal training (13). Peer  
22 support interventions fit within a social support model (14). Within this model, peer  
23 support could reduce feelings of isolation and loneliness, provide information about  
24 accessing available health services, and promote behaviours that positively improve  
25 personal health, well-being, and health practices (14).  
26  
27  
28  
29  
30  
31  
32  
33  
34  
35  
36  
37  
38  
39  
40  
41  
42  
43  
44

45 Currently, the major support program that patients with EIA can access is the Arthritis  
46 Self-Management Program (ASMP) (15). While it provides emotional and appraisal  
47 support, the standardized outline is not personalizable and the group format limits one-  
48 on-one interactions.  
49  
50  
51  
52  
53  
54  
55  
56  
57  
58  
59  
60

1  
2  
3  
4  
5  
6  
7  
8  
9  
10 We propose that a peer support program with trained mentors with established IA will  
11 assist those with EIA to navigate the diverse set of issues and challenges inherent in EIA,  
12 and help them self-manage their disease. An earlier study exploring the learning and  
13 support needs of patients with IA provides a rationale for using peer support (1) and  
14 previous studies have shown that individuals with rheumatoid arthritis (RA) appear to  
15 benefit from relationships they can rely on for emotional support, information, and  
16 tangible assistance (16). Whether a peer support program may facilitate some of these  
17 benefits in patients with EIA has yet to be explored. This study examines the: 1)  
18 development and 2) feasibility and pilot phases of a peer support intervention using the  
19 2008 Medical Research Council (MRC) *Framework for the Development and Evaluation*  
20 *of Randomized Control Trials for Complex Interventions to Improve Health* (17). The  
21 primary objective is to develop a peer mentor training process and establish the feasibility  
22 and acceptability of a peer support program. Secondary objectives include measuring  
23 changes in various outcomes as a result of this intervention (Figure 1). [The development](#)  
24 [phase of the study has been described elsewhere \(20\). This paper reports on the feasibility](#)  
25 [and acceptability of the peer support program and on the secondary outcome measures.](#)  
26  
27  
28  
29  
30  
31  
32  
33  
34  
35  
36  
37  
38  
39  
40  
41  
42

## 43 METHODS

44 The four phases of the 2008 MRC framework guided this complex intervention: (17)  
45 *development phase*, to establish theoretical underpinnings and modeling to achieve an  
46 understanding of the intervention and its possible effects; *feasibility and piloting phase*:  
47 exploratory trial to test feasibility of key intervention components; *evaluation phase*: to  
48  
49  
50  
51  
52  
53  
54

1  
2  
3  
4  
5  
6  
7  
8 assess program effectiveness; and *implementation phase*: to examine long-term  
9 implementation and sustainability (Figure 2).  
10  
11  
12

### 13 14 **Development phase**

#### 15 Identifying the evidence base

16  
17 A qualitative literature search strategy was developed on peer support and chronic  
18 diseases using Medline, EMBASE, CINAHL, and Cochrane Systematic Reviews.  
19  
20 Reviewers independently evaluated papers using a quality assessment tool. Using meta-  
21 ethnography, a methodology to synthesize qualitative literature (18, 19), we determined  
22 how studies were related, translated studies into one another, synthesized translations,  
23 and expressed the synthesized ethnography (20). Quantitative studies were reviewed,  
24 including a draft from a Cochrane Collaboration protocol (4). An environmental scan was  
25 performed and grey literature summarized.  
26  
27  
28  
29  
30  
31  
32  
33  
34

#### 35 Modeling

##### 36 *Needs assessment*

37  
38 A qualitative needs assessment was performed to identify educational preferences and  
39 informational, emotional and appraisal support needs of individuals with IA, and to  
40 determine the suitability of peer support (1). Semi-structured, one-on-one interviews were  
41 performed with patients with IA, their family/friends, and HCPs. Interview audio files,  
42 transcripts and field notes were uploaded to a qualitative software package, NVivo 8, for  
43 coding and analysis. Themes were identified through constant comparative analysis (21).  
44  
45  
46  
47  
48  
49  
50  
51  
52  
53  
54  
55  
56  
57  
58  
59  
60

*Working groups for intervention development*

Three working groups (peer mentor training, peer support program, evaluation) of four to six research team and end users were convened to develop the pilot intervention.

*Expert review*

Using snowball recruiting, expert reviewers were nominated by the research team. They reviewed study information and completed a semi-structured questionnaire by e-mail about the proposed training.

**Figure 1** Flow diagram of the peer support intervention program design.

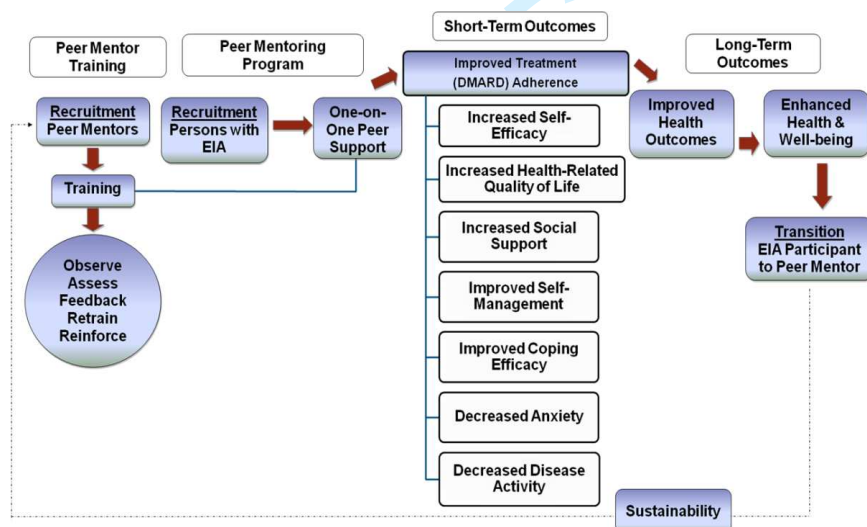

**Figure 2** Flowchart outlining steps in the MRC framework.

**Development Phase**

Identifying the evidence base

Modeling – needs assessment, working groups for peer mentor training development, and expert review

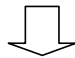

**Feasibility and Piloting Phase**

Peer mentor recruitment and training

Mentee recruitment

Exploratory trial – pairing peer mentors with mentees, program delivery, qualitative and quantitative data collection, including process and outcome measures

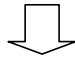

**Future RCT, Evaluation and Implementation**

**Feasibility and piloting phase**

Peer mentor recruitment and training

Potential peer mentors were recruited from the Greater Toronto Area (GTA) through: principal investigator's clinic, word-of-mouth, peer mentors, and e-mails from The Arthritis Society. Mentors were selected based on inclusion criteria (Table 1). Eligibility screening occurred by telephone followed by face-to-face interviews.

**Table 1** Inclusion criteria for peer mentors and mentees

---

Peer mentors

---



1  
2  
3  
4  
5  
6  
7  
8  
9  
10  
11  
12  
13  
14  
15  
16  
17  
18  
19  
20  
21  
22  
23  
24  
25  
26  
27  
28  
29  
30  
31  
32  
33  
34  
35  
36  
37  
38  
39  
40  
41  
42  
43  
44  
45  
46  
47  
48  
49  
50  
51  
52  
53  
54  
55  
56  
57  
58  
59  
60

---

Diagnosis of inflammatory arthritis (IA) from a physician

≥ 18 years of age

Disease duration ≥ 2 years

Currently using medications (DMARDS/biologics) for treatment

Completion of the Arthritis Self-Management Program (ASMP) provided by The Arthritis Society and/or similar program

Able to attend scheduled training sessions

Able to take part in ongoing assessment/evaluation activities (self-reported questionnaires; interviews, observation; activity logs)

Able to commit for duration of study (9-12 months)

Willing to provide ongoing one-on-one support to an individual with newly diagnosed IA

Able to speak, understand, read and write English

---

Mentees

---

EIA disease duration 6-52 weeks

At least 3 swollen joints, assessed by the treating rheumatologist, OR

Positive compression test for metacarpophalangeal joints, OR

Positive compression test for metatarsophalangeal joints, OR

At least 30 minutes of morning stiffness

Prescribed a DMARD/biologic by a rheumatologist

Able to speak, understand, read and write English without the aid of a support person

Able to provide informed consent

---

Peer mentors attended four training sessions (18 hours total). Training provided

information on EIA, educational/support resources, and opportunities to learn and

1  
2  
3  
4  
5  
6  
7  
8 practice peer support techniques (informational, emotional, appraisal support) and skills  
9 (communication, decision-making, goal-setting). Mentors received two initial training  
10 sessions and an additional session based on feedback from researchers and participants.  
11  
12 Peer mentors received a resource binder with information on arthritis and mentoring  
13 resources and ongoing support from the research team via e-mail, telephone, and in-  
14 person.  
15  
16  
17  
18  
19

#### 20 21 22 Mentee recruitment

23 Patients with EIA were recruited from rheumatology clinics in two GTA teaching  
24 hospitals.  
25  
26  
27

#### 28 29 30 Exploratory trial

##### 31 *Pairing and delivery*

32  
33 Mentees were paired with peer mentors based on age and work status. The initial meeting  
34 was face-to-face, with subsequent meetings taking place at the discretion of the pair (in-  
35 person or telephone). Dyads met weekly for approximately 12 weeks. Participants were  
36 brought together at the end for debriefing and celebrating.  
37  
38  
39  
40  
41  
42

##### 43 *Quantitative data collection*

44  
45 24 potential mentors were identified, of which 12 were eligible and 9 completed training.

46  
47 29 potential EIA participants were identified, 9 were enrolled and 8 completed the  
48 program (Figure3)  
49  
50  
51  
52  
53  
54

**Figure 3: Flow Diagram for Peer Mentor and Mentee Recruitment**

Formatted: Centered, Line spacing: single

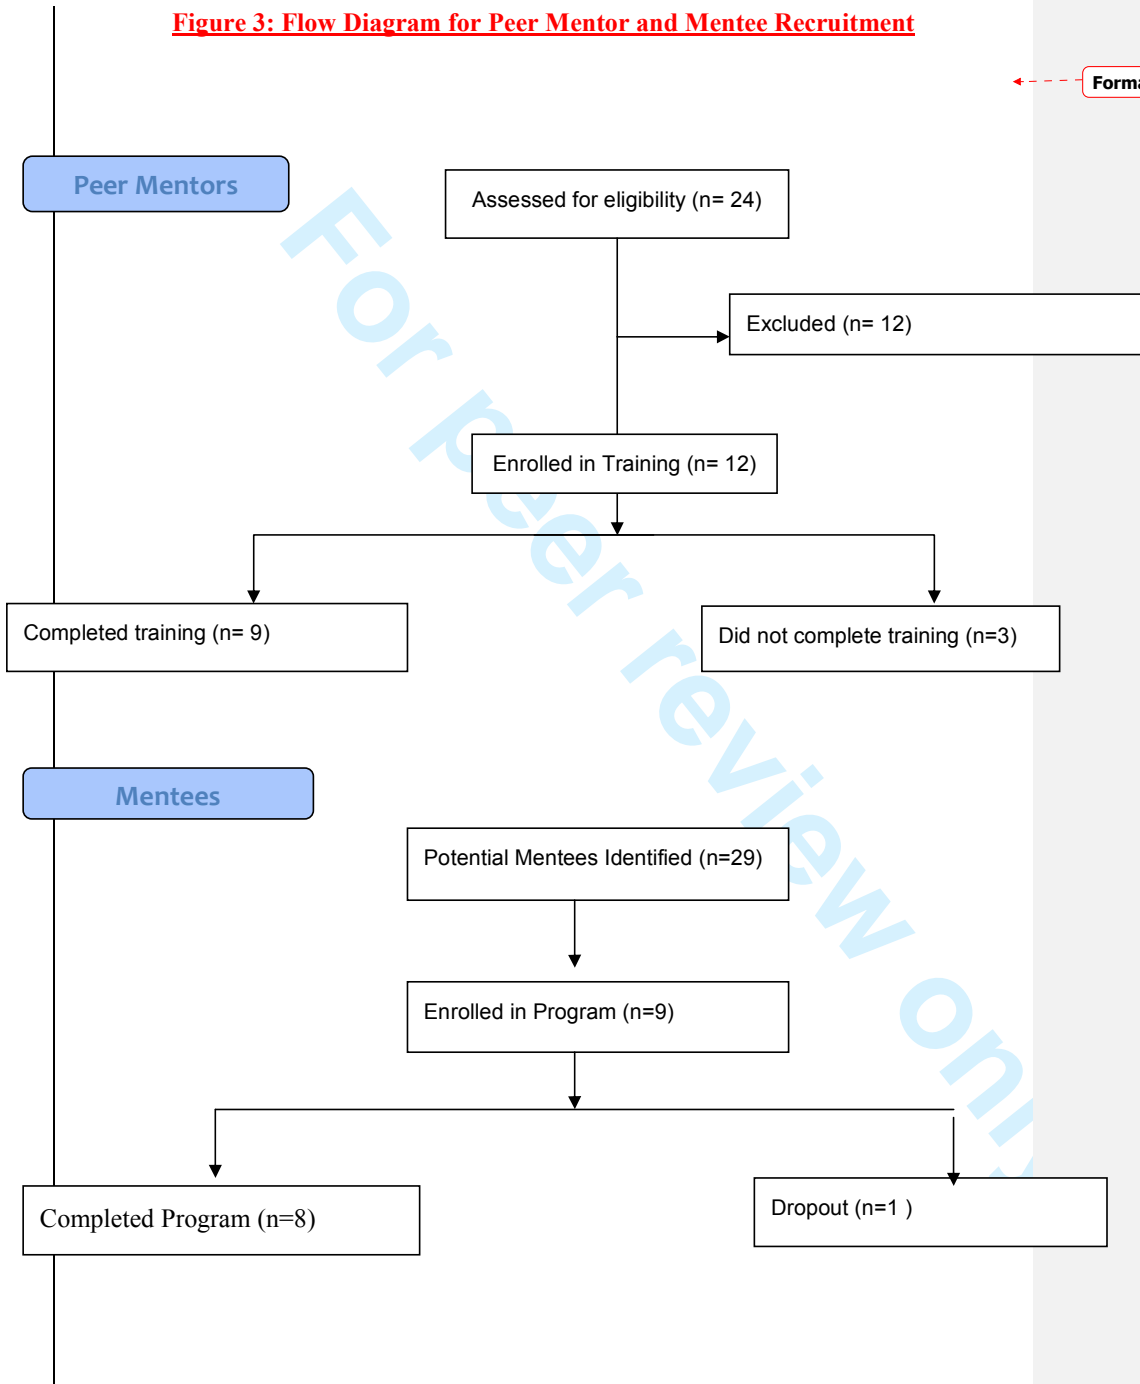

1  
2  
3  
4  
5  
6  
7  
8  
9  
10 A before-and-after design was used to determine changes over time that can be attributed  
11 to the intervention. Peer mentors' self-efficacy was assessed [via a self-administered](#)  
12 [questionnaire at](#) four time points – baseline (T1), post-training (T2), immediately after  
13 program completion (T3) and three months post-program (T4). Mentee outcomes data  
14 were collected [by self-administered questionnaires and clinical assessment](#) at baseline  
15 (T1), immediately after program completion (T2) and three months post-program (T3).  
16 [by self-administered questionnaires and clinical assessment](#). Outcomes are below:

- 17 1) *Adherence* to DMARD/biologic treatment in EIA patients, determined indirectly  
18 through the Morisky scale (22)
- 19 2) *Self-efficacy* measured by Self-Efficacy for Managing Chronic Disease 6-Item Scale (23,  
20 24)
- 21 3) Change in *health-related quality of life and anxiety* measured by Arthritis Impact  
22 Measurement Scales, 2<sup>nd</sup> edition (AIMS2) and dimension sub-score for anxiety,  
23 respectively (25)
- 24 4) *Coping-efficacy* assessed by Gignac et al.'s method Gignac et al. (26)
- 25 5) *Clinical disease activity* assessed by a rheumatologist from the research team  
26 using Clinical Disease Activity Index (CDAI) score (27)
- 27 6) *Social support* measured by Medical Outcomes Study Social Support Survey  
28 (MOSSS) (28)
- 29 7) *Self-management* examined by Patient Activation Measure (PAM) (29)

30  
31  
32  
33  
34  
35  
36  
37  
38  
39  
40  
41  
42  
43  
44  
45  
46  
47  
48  
49 Descriptive statistics and effect sizes were calculated to determine clinically important  
50 (>0.3) changes. Effect size, a unitless measurement of treatment effect, was used to  
51  
52  
53  
54

1  
2  
3  
4  
5  
6  
7  
8 measure the effects of the intervention. An effect size of 0.2 is considered small; 0.5  
9 moderate; and 0.8 large (30).

### 14 *Qualitative data and process measures*

15  
16 Peer mentors completed a training evaluation questionnaire. Implementation process data  
17 was collected to assess acceptability and feasibility. The number and nature of meetings,  
18 topics discussed, and problems arising were recorded by peer mentors via activity log.

19  
20 Research staff called mentors weekly for updates. One-on-one interviews with  
21 participants were conducted to determine acceptability and feasibility of procedures and  
22 outcome measures, and gain perspectives on the value of peer support. Key themes were  
23 identified from transcribed data through constant comparison. Mentees' experiences were  
24 explored using a participant diary at three time points.  
25  
26  
27  
28  
29  
30  
31  
32

33 Ethics approval was obtained from research ethics boards at Sunnybrook Health Sciences  
34 Centre and Mount Sinai Hospital, Toronto, Canada. The study was registered at  
35 <http://www.clinicaltrials.gov> (Identification numbers: NCT01054963, NCT01054131).  
36  
37  
38  
39  
40

## 41 **RESULTS**

### 42 **Development phase**

43 Identifying the evidence base

44  
45 21,489 abstracts across six chronic diseases were identified. Twenty-five articles were  
46 included in the meta-ethnography. Results are reported elsewhere (20).  
47  
48  
49  
50  
51  
52  
53  
54  
55  
56  
57  
58  
59  
60

1  
2  
3  
4  
5  
6  
7  
8 Key themes identified about peer mentor training were: setting boundaries around peer  
9 mentor roles, ensuring confidentiality, enhancing communication skills, providing  
10 continuing education and support for mentors, and sharing personal experiences to aid in  
11 decision-making. Literature about the delivery of peer support programs highlighted the  
12 importance of peer mentor recruitment, selection/assessment, outcome measures, and  
13 mentee recruitment.  
14  
15  
16  
17  
18  
19

## 20 21 22 Modeling

### 23 24 *Needs assessment*

25 Peer support was a well-received approach for helping individuals with EIA to cope with  
26 concerns arising from their diagnosis. Participants perceived that peer mentoring, if  
27 context-driven (paying attention to specific disease phases and individual circumstances)  
28 and sensitive to their needs, could be valuable in managing their disease. Results are  
29 reported elsewhere (1).  
30  
31  
32  
33  
34  
35  
36

### 37 38 *Working groups for intervention development*

39 Each of the working groups met multiple times. Additional members with specific  
40 expertise were added as needed to finalize the intervention.  
41  
42  
43  
44

### 45 46 *Expert review*

47 Eighteen experts (individuals with IA, HCPs, peer support researchers, representatives of  
48 arthritis organizations, educators) provided input into the format/content of the peer  
49 mentor training.  
50  
51  
52  
53  
54

### Feasibility and piloting phase

#### Peer mentor recruitment and training

Twenty-four potential mentors were identified. Twelve were recruited. Nine completed the training and became peer mentors. Three withdrew due to personal illness and/or family issues. All mentors had RA. See Table 2.

#### Mentee recruitment

Twenty-nine potential mentees were identified, nine of whom were eligible and enrolled.

One mentee was lost to follow-up. All nine mentees had RA. See Table 2.

**Table 2** Demographics : Peer mentors ~~s~~ ~~and~~ mentees and peer mentors who withdrew demographics

| Peer mentors (N = 9)     | N |
|--------------------------|---|
| Age (years)              |   |
| 31-40                    | 1 |
| 41-50                    | 2 |
| 51-60                    | 3 |
| 61-70                    | 3 |
| Sex                      |   |
| Female                   | 9 |
| Male                     | 0 |
| Age at diagnosis (years) |   |
| <18                      | 1 |
| 18-30                    | 3 |
| 31-40                    | 3 |

|                     |                                                        |   |
|---------------------|--------------------------------------------------------|---|
|                     | 41-50                                                  | 0 |
|                     | 51-60                                                  | 1 |
|                     | 61-70                                                  | 1 |
| Work status         | Working for pay                                        | 5 |
|                     | Not working/ Homemaker                                 | 2 |
|                     | Retired                                                | 2 |
| <hr/>               |                                                        |   |
| Mentees (N = 9)     |                                                        | N |
| <hr/>               |                                                        |   |
| Age (years)         | 18-30                                                  | 2 |
|                     | 31-50                                                  | 2 |
|                     | 51-60                                                  | 3 |
|                     | 61-70                                                  | 2 |
| Sex                 | Female                                                 | 7 |
|                     | Male                                                   | 2 |
| Marital status      | Single/Never married                                   | 1 |
|                     | Married                                                | 4 |
|                     | Common law/Living with someone                         | 3 |
|                     | Widowed                                                | 1 |
| Living arrangements | Living alone in house or apartment                     | 2 |
|                     | Living with family or friends in house or<br>apartment | 7 |
| Work status         | Working for pay                                        | 6 |



|                            |                                   |   |
|----------------------------|-----------------------------------|---|
|                            | Not working/Homemaker             | 2 |
|                            | Retired                           | 1 |
| Highest level of education | Some/Completed high school        | 1 |
|                            | Some/Completed college/university | 6 |
|                            | Some/Completed post graduate      | 2 |

---

Peer mentors who withdrew (N = 3) N

---

|                    |              |          |
|--------------------|--------------|----------|
| <u>Age (years)</u> | <u>41-50</u> | <u>2</u> |
|                    | <u>51-60</u> | <u>1</u> |

Formatted Table

Formatted: Tab stops: 0.72", Left

|                                 |               |          |
|---------------------------------|---------------|----------|
| <u>Age at diagnosis (years)</u> | <u>&lt;18</u> | <u>1</u> |
|                                 | <u>18-30</u>  | <u>1</u> |
|                                 | <u>41-50</u>  | <u>1</u> |

|            |               |          |
|------------|---------------|----------|
| <u>Sex</u> | <u>Female</u> | <u>3</u> |
|            | <u>Male</u>   | <u>0</u> |

|                  |                              |          |
|------------------|------------------------------|----------|
| <u>Diagnosis</u> | <u>RA</u>                    | <u>2</u> |
|                  | <u>Psoriatic Aehrthritis</u> | <u>1</u> |

|             |                        |          |
|-------------|------------------------|----------|
| <u>Work</u> | <u>Working for pay</u> | <u>3</u> |
|-------------|------------------------|----------|

---

Exploratory trial

#### *Pairing and delivery*

Nine mentor-mentee pairs participated. All mentors were female resulting in two mixed-gender dyads.

#### *Quantitative data collection*

Mentors' reported self-efficacy increased significantly after training completion. However, these measures dropped below baseline upon program completion with recovery to baseline levels at three months post-program (Table 3).

**Table 3** Peer mentor and mentee results

| Peer mentor self-efficacy scale ratings |    |      |                    |         |             |
|-----------------------------------------|----|------|--------------------|---------|-------------|
| Peer mentor reported self-efficacy      | N  | Mean | Standard Deviation | p-value | Effect Size |
| Baseline (T1)                           | 12 | 8.00 | 1.18               |         |             |
| Post Training (T2)                      | 9  | 9.13 | 0.55               | 0.008*  | 1.03        |
| End of Program (T3)                     | 8  | 7.29 | 0.62               | 0.16    | 0.42        |
| 3 Months after Program Completion (T4)  | 8  | 7.88 | 0.58               | 0.86    | 0.03        |

\*-significant (p<0.05)

Mentees' mean outcome scores at baseline (T1) and program completion (T2)

|  | T1-T2 | Effect Size |
|--|-------|-------------|
|  |       |             |

| Measurement                                                   | N | T1    | T2    | (SD)  | T1-T2<br>(Mean) |
|---------------------------------------------------------------|---|-------|-------|-------|-----------------|
| Medication Adherence (Morisky scale)                          | 8 | 0.78  | 0.63  | 0.53  | 0               |
| Self-Efficacy Scale                                           | 8 | 7.59  | 7.75  | 1.01  | 0.04            |
| Arthritis Impact Measurement Scales (AIMS2) – Short Form (SF) |   |       |       |       |                 |
| • AIMS2-SF                                                    | 5 | 30.26 | 28.96 | 1.33  | 0.39            |
| • AIMS2-Physical (/10)                                        | 8 | 8.36  | 8.60  | 1.98  | 0.19            |
| • AIMS2-Symptoms (/10)                                        | 8 | 2.59  | 1.56  | 2.23  | 0.28            |
| • AIMS2-Affect (/10)                                          | 8 | 5.56  | 5.31  | 1.03  | 0.27            |
| • AIMS2-Social (/10)                                          | 8 | 5.76  | 5.47  | 0.93  | 0.47            |
| • AIMS2-Work (/10)                                            | 5 | 7.66  | 8.13  | 2.05  | 0.42            |
| Coping Efficacy (Gignac et al.)                               | 8 | 4.08  | 4.41  | 0.46  | 0.35            |
| Clinical Disease Activity (CDAI)                              | 6 | 9.94  | 5.68  | 3.91  | 0.19            |
| Medical Outcomes Study Social Support Survey (MOSSS)          | 8 | 3.77  | 4.11  | 0.28  | 0.30            |
| Patient Activation Measure (PAM)                              | 8 | 75.80 | 73.11 | 11.75 | 0.22            |

Mentees experienced improvement in overall arthritis impact on health-related quality of life, coping, and social support. Self-reported measures at program completion (12 weeks, T2) showed significant improvements (effect size >0.3) in the overall AIMS2-SF and Social and Work subcomponents. Mentees reported improvements based on Social

1  
2  
3  
4  
5  
6  
7  
8 Support (MOSSS) and Coping Efficacy. There were no significant effects in Disease  
9  
10 Activity Measures Index (CDAI), Medication Adherence (Morisky) or Self-Efficacy  
11  
12 Scale. None of these measures showed sustained improvement three months post-  
13  
14 program (T3) (Table 3).

15  
16  
17  
18 *Qualitative data and process measures*

19  
20 Average number of meetings was 8.11 (range=6-12). Average length of meetings was  
21  
22 36.90 minutes (range=10-120 minutes). Mode of contact after initial face-to-face meeting  
23  
24 was telephone only for four dyads, with the remaining five dyads using a mix of  
25  
26 telephone and face-to-face.

27  
28  
29 Key themes revealed from the 17 interviews are categorized below:

30  
31 *Mentor-specific experiences*

32  
33 Peer mentors largely appreciated their training; they valued the emotional support content  
34  
35 of the training program and being able to work through simulated scenarios. Mentors  
36  
37 reported personally benefiting from the program. They reported it increased their  
38  
39 knowledge, provided new self-management techniques and coping strategies (PM3, PM4,  
40  
41 PM7, PM9, PM12), reinforced self-management strategies they were familiar with, and  
42  
43 made them realize how far they had come in their disease experience (PM12, PM8).

44  
45  
46  
47 A few mentors experienced challenges (e.g., mentee reluctant to stop consuming alcohol  
48  
49 to take methotrexate (PM7); mentee with problems returning to work after being on long-  
50

1  
2  
3  
4  
5  
6  
7  
8 term disability (PM8)). These mentors (PM7, PM8) also experienced challenges in  
9  
10 arranging sessions.

### 11 12 13 14 *Mentee-specific experiences*

15  
16 Emotional and informational supports were most commonly reported. One mentee  
17  
18 described his mentor as, “a book, as far as I’m concerned, she has more information than I  
19  
20 can absorb, really” (EIA8). Informational support was not confined to program resources,  
21  
22 but also included mentors’ experiential knowledge:

23  
24 “I would ask her when she encountered bad weather, how were her joints? What did she  
25  
26 do about that? ... Can I do something prior to, when you know the weather is coming”  
27  
28 (EIA3).

29  
30 Appraisal and instrumental support were also exchanged. One mentee said:

31  
32 “It was great being able to sit down and have a normal conversation, but at the same time  
33  
34 throw in, oh yeah, I’m thinking about switching to biologics so what’s your opinion?”  
35  
36 (EIA1).

### 37 38 39 *The inter-subjective dynamics of peer support*

40  
41 Participants’ experience of peer support was informed by the unique relationship they  
42  
43 forged with their peer. Many participants spoke of having “a connection” with his/her  
44  
45 peer. This was facilitated by similarities in personality, age, gender, interests, life stage,  
46  
47 position of responsibility at work, diagnosis, disease severity, and similarity of affected  
48  
49 joints. “My hands felt like her hands,” said one mentee (EIA4). Four participants faced  
50  
51 challenges building rapport due to differences in gender, sexuality, political views and  
52  
53  
54  
55  
56  
57  
58  
59  
60

1  
2  
3  
4  
5  
6  
7  
8 disease stage. Gender differences restricted the type of conversations in one mixed  
9 gender dyad. In another dyad, a mentee found herself disassociating from her wheelchair-  
10 bound mentor, as she was not able to cope with this:  
11

12  
13  
14 “... I found myself looking at my mentor and going, that's not me, I don't have that, I'm  
15 not going there, I'm not going to be in a wheelchair... or be badly deformed.” (EIA6).  
16  
17

18  
19  
20 While such experiences complicated the work of providing and receiving peer support,  
21 all participants were unequivocal about the need for a peer support program for  
22 individuals with EIA. Mentees spoke about the program as “critical” (EIA1), declaring,  
23 “It can't stop. It can't” (EIA3). Mentors wished that similar peer support interventions  
24 had been available when they were first diagnosed.  
25  
26  
27  
28  
29

## 30 31 **DISCUSSION**

32  
33 In this study, we piloted a peer support program for patients with EIA using the 2008  
34 MRC framework (17). Information from the development phase, with input from  
35 working groups and expert reviewers and a qualitative needs assessment were used to  
36 develop a pilot peer support intervention. A complementary, inductive approach helped  
37 to make additional sense of learning and support needs, how and why the intervention  
38 met (or failed to meet) these needs and to generate information and hypotheses for testing  
39 with quantitative research methods.  
40  
41  
42  
43  
44  
45  
46  
47  
48

49 A peer support program could help patients with EIA navigate the issues surrounding  
50 their disease. The potential advantage of peer support relates to its focus on impacts on  
51  
52  
53  
54

1  
2  
3  
4  
5  
6  
7  
8 daily activities and functioning rather than medical information (4). Peer support  
9 encourages sharing of experiences between participants with personalized and flexible  
10 content. Our results suggested that both mentors and mentees perceived benefits from the  
11 program. Mentors described largely positive benefits including role satisfaction, and  
12 increase in their own knowledge and self-management techniques.  
13  
14  
15  
16  
17  
18  
19

20 Few qualitative studies to date have rigorously evaluated the effect of peer support on  
21 mentors themselves (31). Our study assessed the self-efficacy of peer mentors. Self-  
22 efficacy is the belief in one's own ability to perform well (32). While self-efficacy scores  
23 of mentors increased after training, scores decreased below baseline after 12 weeks of  
24 mentoring and three months post- program. This raises concerns that being a peer mentor  
25 could be a demanding and stressful experience (33), especially for mentors who  
26 expressed concerns with their mentees. The success of a peer support program also relies  
27 on the skills and retention of peer mentors. Our preliminary results suggest that regular  
28 training and practice sessions may be necessary to maintain mentors' self-efficacy.  
29  
30  
31  
32  
33  
34  
35  
36  
37  
38

39 Mentees showed improvements in a number of outcome measures including the Social  
40 and Work components of AIMS2-SF, Coping Efficacy and Social Support. There was a  
41 small improvement in Affect and Symptom components of AIMS2-SF. Our study did not  
42 demonstrate a significant effect of the intervention on disease activity (CDAI) and this  
43 mirrors previous quantitative studies (34), which found no significant reduction in joint  
44 counts in RA patients who received patient-education interventions. However, the main  
45 thrust behind the study was to develop an individualized support program that was  
46  
47  
48  
49  
50  
51  
52  
53  
54  
55  
56  
57  
58  
59  
60

1  
2  
3  
4  
5  
6  
7  
8 responsive to the needs of each patient. Thus, improvements in the Coping Efficacy and  
9 Social Support scores are encouraging. The fact that improvements were not sustained  
10 three months post-program would suggest that three months may be insufficient for  
11 mentees to develop knowledge and skills to help them adapt to their disease. We know  
12 from education literature that “booster sessions” may be required to sustain knowledge  
13 and skill sets (35), although other studies have questioned their effectiveness (36).  
14  
15  
16  
17  
18  
19

20  
21 Our study did not demonstrate any effect on medication adherence. This reflects previous  
22 data that interventions to increase medication adherence in chronic conditions are  
23 complex, and that a large proportion of patient education interventions in this setting have  
24 been ineffective (37). A recent peer-support intervention for type 2 diabetes also yielded  
25 null results, but participants thought they would benefit from peer support early after  
26 diagnosis (33).  
27  
28  
29  
30  
31  
32  
33

34  
35 A limitation is the small sample size. Also, there was no control group in this study.

36  
37 However, this study was designed as a feasibility and pilot study. The goal was to  
38 ~~determine change over time in the outcome measures that can be attributed to the~~  
39 ~~intervention and~~ to obtain initial data for planning and implementing a larger scale study.  
40  
41  
42

43 As such, results from this preliminary pilot are not meant to be generalized. In addition, A  
44 all trained mentors and mentees had RA, limiting the generalizability to other types of IA.

45  
46 Matching pairs based on personal and social characteristics was important but-  
47 Unfortunately, were unable to match all pairs by gender. The two mixed gender dyads  
48  
49 reported that this may have limited the types of conversations they had.  
50  
51  
52  
53  
54



1  
2  
3  
4  
5  
6  
7  
8  
9  
10 In summary, this study showed that developing and delivering a peer support program  
11 was acceptable, feasible with modifications, and well-received by peer mentors and  
12 mentees. Peers can be instrumental in promoting self-management and improving one's  
13 ability to cope with the diagnosis of a chronic disease. Peers also facilitate social support  
14 and may be a useful adjunct to standard rheumatologic care. The information gleaned  
15 from this study has been incorporated into a randomized, wait-list controlled study  
16 [comparing the "peer support program" with a "standard care" control group now in](#)  
17 [progress](#) to further assess the benefits of peer support in EIA management.  
18  
19  
20  
21  
22  
23  
24  
25  
26  
27

28 **Acknowledgements** We would like to thank the research participants for their  
29 contribution to this study. We also recognize the important role of the other members of  
30 the research team for their contribution to this project (Emma Bell, Jennifer Boyle, Nicky  
31 Britten, Mary Cox-Dublanski, Kerry Knickle, Joyce Nyhof-Young, Laure Perrier, Susan  
32 Ross, Joan Sargeant, Ruth Tonon, Peter Tugwell, Fiona Webster).  
33  
34  
35  
36  
37  
38

#### 39 **Author Contributions**

40 Mary Bell – Principal Investigator, intervention development, implementation and  
41 evaluation, data analysis, manuscript writing  
42  
43

44 Sharron Sandhu – Co-investigator, intervention development and implementation, data  
45 analysis, manuscript writing  
46  
47

48 Paula Veinot - ~~Project Manager,~~ Intervention development, implementation and  
49 evaluation, data analysis, manuscript writing  
50  
51  
52  
53  
54

1  
2  
3  
4  
5  
6  
7  
8 Gayathri Embuldeniya - ~~Research Assistant~~, ~~i~~Intervention development, implementation  
9 and evaluation, data analysis, manuscript writing  
10

11 Sydney Brooks – Co-investigator, intervention development, implementation and  
12 evaluation, data analysis, manuscript writing  
13

14 Joanna Sale – Co-investigator, intervention development, evaluation, manuscript writing  
15

16 Sicong Huang – ~~Medical student~~, ~~d~~Data analysis, manuscript writing  
17

18 Alex Zhao - ~~Medical student~~, ~~d~~Data analysis, manuscript writing  
19

20 Dawn Richards - ~~Research team member/consumer collaborator~~, ~~i~~Intervention  
21 development, implementation and evaluation, manuscript writing  
22  
23

24  
25  
26 **All authors approved the final version for publication**  
27

28  
29  
30 **Funding** This received funding from the Canadian Arthritis Network, Canadian Institutes  
31 of Health Research, and Ontario Rehabilitation Research Advisory Network.  
32

33  
34  
35 **Data sharing statement** No additional data available  
36

37  
38  
39 **Competing interests** The authors have no competing interests to declare.  
40  
41  
42  
43  
44  
45  
46  
47  
48  
49  
50  
51  
52  
53  
54

## REFERENCES

1. Tran CSJ, Nyhof-Young J, Embuldeniya G, et al. Exploring the learning and support needs of individuals with inflammatory arthritis. *Univ Toronto Med J* 2012;**89**:88-94.
2. Sakalys JA. Illness behavior in rheumatoid arthritis. *Arthritis Rheum* 1997;**10**:229-237.
3. Branch VK, Lipsky K, Nieman T, et al. Positive impact of an intervention by arthritis patient educators on knowledge and satisfaction of patients in a rheumatology practice. *Arthritis Care Res* 1999;**12**:370-375.
4. Doull M, O'Connor AM, Robinson V, et al. Peer support strategies for improving the health and well-being of individuals with chronic diseases (Protocol). *Cochrane Libr* 2005;**3**:CD005352.
5. Walker JG, Jackson HJ, Littlejohn GO. Models of adjustment to chronic illness: Using the example of rheumatoid arthritis. *Clin Psychol Rev* 2004;**24**:461-488.
6. Pollock SE, Christian BJ, Sands D. Responses to chronic illness: Analysis of psychological and physiological adaptation. *Nurs Res* 1990;**39**:300-304.
7. Combe B, Landewe R, Lukas C, et al. EULAR recommendations for the management of early arthritis: report of a task force of the European Standing Committee for International Clinical Studies Including Therapeutics (ESCISIT). *Ann Rheum Dis* 2007;**66**:34-45.
8. Holbrook AM. Ontario treatment guidelines for osteoarthritis, rheumatoid arthritis, and acute musculoskeletal injury. Toronto, ON: Queen's Printer of Ontario 2000.

- 1  
2  
3  
4  
5  
6  
7  
8  
9 9. Jordan KM, Arden NK, Doherty M, et al. EULAR Recommendations 2003: an  
10 evidence based approach to the management of knee osteoarthritis: Report of a  
11 Task Force of the Standing Committee for International Clinical Studies Including  
12 Therapeutic Trials (ESCISIT). *Ann Rheum Dis* 2003;**62**:1145-55.
- 13  
14  
15  
16 10. Beckmann K, Strassnick K, Abell L, et al. Is a chronic disease self-management  
17 program beneficial to people affected by cancer? *Aust J Prim Health* 2007;**13**:36-  
18 44.
- 19  
20  
21  
22 11. Morisky DE, Ang A, Coly A, et al. A model HIV/AIDS risk reduction programme  
23 in the Philippines: a comprehensive community-based approach through  
24 participatory action research. *Health Promot Int* 2004;**19**:69-76.
- 25  
26  
27  
28 12. Keyserling TC, Samuel-Hodge CD, Ammerman AS, et al. A randomized trial of  
29 an intervention to improve self-care behaviors of African-American women with  
30 type 2 diabetes: impact on physical activity. *Diabetes Care* 2002;**25**:1576-83.
- 31  
32  
33  
34 13. Dennis CL. Peer support within a health care context: A concept analysis. *Int J*  
35 *Nurs Stud* 2003;**40**:321-32.
- 36  
37  
38  
39 14. Cohen S, Gottlieb BH, Underwood LG. Social support measurement and  
40 intervention. In: Cohen S, Gottlieb BH, Underwood LG, eds. *Measuring and*  
41 *intervening in social support*. New York, NY: Oxford University Press 2000:3-28.
- 42  
43  
44  
45 15. Implementation Manual Stanford Self-Management Programs 2008. Palo Alto,  
46 CA: Stanford University 2008 [accessed Aug 2012]. Available from:  
47 [http://patienteducation.stanford.edu/licensing/Implementation\\_Manual2008.pdf](http://patienteducation.stanford.edu/licensing/Implementation_Manual2008.pdf).

- 1  
2  
3  
4  
5  
6  
7  
8  
9  
10  
11  
12  
13  
14  
15  
16  
17  
18  
19  
20  
21  
22  
23  
24  
25  
26  
27  
28  
29  
30  
31  
32  
33  
34  
35  
36  
37  
38  
39  
40  
41  
42  
43  
44  
45  
46  
47  
48  
49  
50  
51  
52  
53  
54  
55  
56  
57  
58  
59  
60
16. Affleck G, Pfeiffer CA, Tennen H, et al. Social support and psychosocial adjustment to rheumatoid arthritis: Quantitative and qualitative findings. *Arthritis Rheum* 1988;**1**:71-77.
  17. Craig P, Dieppe P, Macintyre S, et al. Developing and evaluating complex interventions: the new Medical Research Council guidance. *BMJ* 2008;**337**:a1655.
  18. Noblit GW, Hare RD. Meta-ethnography: Synthesizing qualitative studies. Newbury Park, CA: Sage Publication 1988.
  19. Britten N, Campbell R, Pope C, et al. Using meta ethnography to synthesise qualitative research: a worked example. *J Health Serv Res Policy* 2002;**7**:209-15.
  20. Embuldeniya G, Veinot P, Bell E, et al. (2012, submitted). The experience and impact of chronic disease peer support interventions: A qualitative synthesis. *Patient Educ Couns*.
  21. Strauss A, Corbin J. Basics of qualitative research: Techniques and procedures for developing grounded theory, 3rd ed. Thousand Oaks, CA: Sage Publications 2008.
  22. Morisky DE, Green LW, Levine DM. Concurrent and predictive validity of a self-reported measure of medication adherence. *Med Care* 1986;**24**:67-74.
  23. Lorig K, Chastain RL, Ung E, et al. Development and evaluation of a scale to measure perceived self-efficacy in people with arthritis. *Arthritis Rheum* 1989;**32**:37-44.
  24. Stanford Patient Education Research Center. Chronic disease self-management questionnaire codebook. Palo Alto, CA: Stanford University 2007 [accessed Aug 2012]. Available from:  
<http://patienteducation.stanford.edu/research/cdCodeBook.pdf>.

- 1  
2  
3  
4  
5  
6  
7  
8  
9  
10  
11  
12  
13  
14  
15  
16  
17  
18  
19  
20  
21  
22  
23  
24  
25  
26  
27  
28  
29  
30  
31  
32  
33  
34  
35  
36  
37  
38  
39  
40  
41  
42  
43  
44  
45  
46  
47  
48  
49  
50  
51  
52  
53  
54  
55  
56  
57  
58  
59  
60
25. Meenan RF, Mason JH, Anderson JJ, et al. AIMS2. The content and properties of a revised and expanded Arthritis Impact Measurement Scales Health Status Questionnaire. *Arthritis Rheum* 1992;**35**:1-10.
26. Gignac MA, Cott C, Badley EM. Adaptation to chronic illness and disability and its relationship to perceptions of independence and dependence. *J Gerontol B Psychol Sci Soc Sci* 2000;**55**:362-72.
27. Aletaha D, Nell VPK, Stamm T, et al. Acute phase reactants add little to composite disease activity indices for rheumatoid arthritis: Validation of a clinical activity score. *Arth Res Ther* 2005;**7**:R796-806.
28. Sherbourne CD, Stewart AL. The MOS social support survey. *Soc Sci Med* 1991;**32**:705-14.
29. Hibbard JH, Mahoney ER, Stockard J, et al. Development and testing of a short form of the patient activation measure. *Health Serv Res* 2005;**40**:1918-30.
30. Cohen J. *Statistical Power Analysis for the Behavioral Sciences*, 2nd ed. Hillsdale, NJ: Erlbaum 1988.
31. Ebreo A, Feist-Price S, Siewe Y, et al. Effects of peer education on the peer educators in a school-based HIV prevention program: where should peer education research go from here? *Health Educ Behav* 2002;**29**:411-43.
32. Bandura A. Self-efficacy: toward a unifying theory of behavioral change. *Psychol Rev* 1977;**84**:191-215.
33. Smith SM, Paul G, Kelly A, et al. Peer support for patients with type 2 diabetes: cluster randomised control trial. *BMJ* 2011;**342**:d715.

- 1  
2  
3  
4  
5  
6  
7  
8  
9  
10  
11  
12  
13  
14  
15  
16  
17  
18  
19  
20  
21  
22  
23  
24  
25  
26  
27  
28  
29  
30  
31  
32  
33  
34  
35  
36  
37  
38  
39  
40  
41  
42  
43  
44  
45  
46  
47  
48  
49  
50  
51  
52  
53  
54  
55  
56  
57  
58  
59  
60
34. Riemsma RP, Kirwan JR, Taal E, et al. Patient education for adults with rheumatoid arthritis. *Cochrane Database Syst Rev* 2003;**2**:CD003688.
35. Taal E, Rasker JJ, Wiegman O. Group education for rheumatoid arthritis patients. *Semin Arthritis Rheum* 1997;**26**:805-16.
36. Kroese FM, Adriaanse MA, De Ridder DTD. Boosters, anyone? Exploring the added value of booster sessions in a self-management intervention. *Health Educ Res* 2012;doi:10.1093/her/cys062.
37. Haynes RB, Ackloo E, Sahota N, McDonald HP, Yao X. Interventions for enhancing medication adherence. *Cochrane Database Syst Rev* 2008;**2**:CD000011.

1  
2  
3 We have adhered to guidelines for Mixed Methods studies as per:  
4 O'Cathain A, Murphy E, Nicholl J. The quality of mixed methods studies in health services  
5 research. J Health Serv Res Policy. 2008;13(2):92-8. PMID: 18416914.  
6  
7

- 8 • Is the quantitative component feasible? Yes
- 9 • Is the qualitative component feasible? Yes
- 10 • Is the mixed methods design feasible? Yes
- 11 • Have both qualitative and quantitative components been completed? Yes
- 12 • Were some quantitative methods planned but not executed? No
- 13 • Were some qualitative methods planned but not executed? No
- 14 • Did the mixed methods design work in practice? Yes
- 15 • Is the use of mixed methods research justified? Yes
- 16 • Is the design for mixing methods described?
  - 17 ○ Priority Yes
  - 18 ○ Purpose Yes
  - 19 ○ Sequence Yes
  - 20 ○ Stage of integration Yes
- 21 • Is the design clearly communicated? Yes
- 22 • Is the design appropriate for addressing the research questions? Yes
- 23 • Has rigour of the design been considered (proposal) or adhered to (report)? Yes
- 24 • Is the role of each method clear? Yes
- 25 • Is each method described in sufficient detail? Yes
- 26 • Is each method appropriate for addressing the research question? Yes
- 27 • Is the approach to sampling and analysis appropriate for its purpose? Yes
- 28 • Is there expertise among applicants/authors? Yes
- 29 • Is there expertise on the team to undertake each method? Yes
- 30 • Have issues of validity been addressed for each method? Yes
- 31 • Has the rigour of any method been compromised? Yes
- 32 • Is each method sufficiently developed for its purpose? Yes
- 33 • Is the (intended) analysis sufficiently sophisticated? Yes
- 34 • Is the role of each method clear? Yes
- 35 • Is each method described in sufficient detail? Yes
- 36 • Did appropriate members of the team participate in integration? Yes
- 37 • Is there evidence of communication within the team? Yes
- 38 • Has rigour been compromised by the process of integration? No
- 39 • Is there clarity about which results have emerged from which methods? Yes
- 40 • Are inferences appropriate? Yes
- 41 • Are the results of all the methods considered sufficiently in the interpretation? Yes
- 42
- 43
- 44
- 45
- 46
- 47
- 48
- 49
- 50
- 51
- 52
- 53
- 54
- 55
- 56
- 57
- 58
- 59
- 60
